# Supplementary material for: Evaluation of type 2 diabetes genetic risk variants in Chinese adults: findings from 93,000 individuals from the China Kadoorie Biobank
Source: Springer Nature journal article supplement (doi:10.1007/s00125-016-3920-9), 2016-04-06
Supplement: MOESM3 [file 10017744]

ESM Table 2 Weights applied to construct genetic risk scores

| SNP        | Nearby Genes       | R/A | DIAGRAMv3                                           | AGEN-T2D                                              | MetaboChip                                           | TransEthnic                                                                                                                                                                                              | TransEthnic+CKB                                                                                                                                                                                           | Classification     |
|------------|--------------------|-----|-----------------------------------------------------|-------------------------------------------------------|------------------------------------------------------|----------------------------------------------------------------------------------------------------------------------------------------------------------------------------------------------------------|-----------------------------------------------------------------------------------------------------------------------------------------------------------------------------------------------------------|--------------------|
|            |                    |     | (Europeans: up to 12,171 cases and 56,862 controls) | (East Asians: up to 25,079 cases and 29,611 controls) | (Europeans: up to 34,840 cases and 114,981 controls) | (Europeans: 12,171 cases and 56,862 controls; East Asians: 6,952 cases and 11,865 controls; South Asians: 5,561 cases and 14,458 controls; Mexicans and Mexican Americans: 1,804 cases and 779 controls) | (Europeans: 12,171 cases and 56,862 controls; East Asians: 14,061 cases and 97,887 controls; South Asians: 5,561 cases and 14,458 controls; Mexicans and Mexican Americans: 1,804 cases and 779 controls) |                    |
| rs340874   | <i>PROX1</i>       | C/T | 0.077                                               | 0.077                                                 | 0.064                                                | 0.068                                                                                                                                                                                                    | 0.059                                                                                                                                                                                                     | Beta Cell Function |
| rs7578597  | <i>THADA</i>       | T/C | 0.131                                               | -0.073                                                | 0.127                                                | 0.068                                                                                                                                                                                                    | 0.073                                                                                                                                                                                                     | Beta Cell Function |
| rs11708067 | <i>ADCY5</i>       | A/G | 0.095                                               | 0.166                                                 | 0.107                                                | 0.095                                                                                                                                                                                                    | 0.103                                                                                                                                                                                                     | Beta Cell Function |
| rs1470579  | <i>IGF2BP2</i>     | C/A | 0.113                                               | 0.140                                                 | 0.120                                                | 0.122                                                                                                                                                                                                    | 0.117                                                                                                                                                                                                     | Beta Cell Function |
| rs16861329 | <i>ST6GALI</i>     | C/T | 0.030                                               | -0.083                                                | <b>0.03</b> <sup>c</sup>                             | 0.086                                                                                                                                                                                                    | 0.067                                                                                                                                                                                                     | Beta Cell Function |
| rs6815464  | <i>MAEA</i>        | C/G | 0.14 <sup>a</sup>                                   | 0.122                                                 | 0.071 <sup>b</sup>                                   | 0.095                                                                                                                                                                                                    | 0.080                                                                                                                                                                                                     | Beta Cell Function |
| rs7754840  | <i>CDKALI</i>      | C/G | 0.140                                               | 0.166                                                 | 0.126                                                | 0.140                                                                                                                                                                                                    | 0.159                                                                                                                                                                                                     | Beta Cell Function |
| rs2191349  | <i>DGKB</i>        | T/G | 0.068                                               | 0.115                                                 | 0.050                                                | 0.086                                                                                                                                                                                                    | 0.073                                                                                                                                                                                                     | Beta Cell Function |
| rs4607517  | <i>GCK</i>         | A/G | 0.049                                               | 0.030                                                 | 0.073                                                | 0.030                                                                                                                                                                                                    | 0.026                                                                                                                                                                                                     | Beta Cell Function |
| rs6467136  | <i>GCC1-PAX4</i>   | G/A | -0.010                                              | 0.104                                                 | <b>-0.01</b> <sup>c</sup>                            | 0.020                                                                                                                                                                                                    | 0.021                                                                                                                                                                                                     | Beta Cell Function |
| rs13266634 | <i>SLC30A8</i>     | C/T | 0.148                                               | 0.100                                                 | 0.126                                                | 0.131                                                                                                                                                                                                    | 0.116                                                                                                                                                                                                     | Beta Cell Function |
| rs7041847  | <i>GLIS3</i>       | A/G | 0.049                                               | 0.095                                                 | 0.041                                                | 0.058                                                                                                                                                                                                    | 0.057                                                                                                                                                                                                     | Beta Cell Function |
| rs10811661 | <i>CDKN2A/B</i>    | T/C | 0.166                                               | 0.109                                                 | 0.169                                                | 0.191                                                                                                                                                                                                    | 0.194                                                                                                                                                                                                     | Beta Cell Function |
| rs1111875  | <i>HHEX/IDE</i>    | C/T | 0.140                                               | 0.081                                                 | 0.105                                                | 0.113                                                                                                                                                                                                    | 0.111                                                                                                                                                                                                     | Beta Cell Function |
| rs7901695  | <i>TCF7L2</i>      | C/T | 0.315                                               | 0.166                                                 | 0.296                                                | 0.270                                                                                                                                                                                                    | 0.274                                                                                                                                                                                                     | Beta Cell Function |
| rs2237892  | <i>KCNQ1</i>       | C/T | 0.113                                               | 0.175                                                 | 0.147                                                | 0.182                                                                                                                                                                                                    | 0.208                                                                                                                                                                                                     | Beta Cell Function |
| rs5215     | <i>KCNJ11</i>      | C/T | 0.077                                               | 0.095                                                 | 0.072                                                | 0.086                                                                                                                                                                                                    | 0.079                                                                                                                                                                                                     | Beta Cell Function |
| rs1552224  | <i>ARAP1</i>       | A/C | 0.122                                               | 0.148                                                 | 0.102                                                | 0.095                                                                                                                                                                                                    | 0.095                                                                                                                                                                                                     | Beta Cell Function |
| rs10830963 | <i>MTNR1B</i>      | G/C | 0.104                                               | 0.000                                                 | 0.096                                                | 0.086                                                                                                                                                                                                    | 0.054                                                                                                                                                                                                     | Beta Cell Function |
| rs1359790  | <i>SPRY2</i>       | G/A | 0.095                                               | 0.052                                                 | 0.074                                                | 0.068                                                                                                                                                                                                    | 0.065                                                                                                                                                                                                     | Beta Cell Function |
| rs7172432  | <i>VPS13C</i>      | A/G | 0.058                                               | 0.101                                                 | <b>0.058</b> <sup>c</sup>                            | 0.068                                                                                                                                                                                                    | 0.066                                                                                                                                                                                                     | Beta Cell Function |
| rs2028299  | <i>AP3S2</i>       | C/A | 0.039                                               | 0.077                                                 | <b>0.039</b>                                         | 0.068                                                                                                                                                                                                    | 0.065                                                                                                                                                                                                     | Beta Cell Function |
| rs8042680  | <i>PRC1</i>        | A/C | 0.068                                               | 0.495                                                 | 0.065                                                | 0.068                                                                                                                                                                                                    | 0.062                                                                                                                                                                                                     | Beta Cell Function |
| rs4430796  | <i>HNFB1</i>       | G/A | 0.122                                               | 0.113                                                 | 0.093                                                | 0.095                                                                                                                                                                                                    | 0.095                                                                                                                                                                                                     | Beta Cell Function |
| rs6017317  | <i>HNFB4</i>       | G/T | 0.058                                               | 0.086                                                 | <b>0.058</b> <sup>c</sup>                            | 0.068                                                                                                                                                                                                    | 0.059                                                                                                                                                                                                     | Beta Cell Function |
| rs780094   | <i>GCKR</i>        | C/T | 0.039                                               | 0.058                                                 | 0.060                                                | 0.058                                                                                                                                                                                                    | 0.066                                                                                                                                                                                                     | Insulin Resistance |
| rs3923113  | <i>GRB14</i>       | A/C | 0.039                                               | 0.030                                                 | 0.070                                                | 0.077                                                                                                                                                                                                    | 0.051                                                                                                                                                                                                     | Insulin Resistance |
| rs2943641  | <i>IRS1</i>        | C/T | 0.077                                               | 0.113                                                 | 0.089                                                | 0.086                                                                                                                                                                                                    | 0.081                                                                                                                                                                                                     | Insulin Resistance |
| rs1801282  | <i>PPARG</i>       | C/G | 0.148                                               | 0.140                                                 | 0.123                                                | 0.131                                                                                                                                                                                                    | 0.115                                                                                                                                                                                                     | Insulin Resistance |
| rs972283   | <i>KLF14</i>       | G/A | 0.095                                               | -0.010                                                | 0.041                                                | 0.049                                                                                                                                                                                                    | 0.045                                                                                                                                                                                                     | Insulin Resistance |
| rs1531343  | <i>HMG2</i>        | C/G | 0.140                                               | 0.058                                                 | 0.118                                                | 0.095                                                                                                                                                                                                    | 0.081                                                                                                                                                                                                     | Insulin Resistance |
| rs831571   | <i>PSMD6</i>       | C/T | 0.030                                               | 0.090                                                 | <b>0.03</b> <sup>c</sup>                             | 0.049                                                                                                                                                                                                    | 0.052                                                                                                                                                                                                     | Insulin Resistance |
| rs10923931 | <i>NOTCH2</i>      | T/G | 0.095                                               | 0.000                                                 | 0.079                                                | 0.049                                                                                                                                                                                                    | 0.062                                                                                                                                                                                                     | Unclassified       |
| rs243021   | <i>BCL11A</i>      | A/G | 0.086                                               | 0.049                                                 | 0.065                                                | 0.068                                                                                                                                                                                                    | 0.068                                                                                                                                                                                                     | Unclassified       |
| rs6780569  | <i>UBE2E2</i>      | G/A | 0.086                                               | 0.156                                                 | <b>0.086</b> <sup>c</sup>                            | 0.095                                                                                                                                                                                                    | 0.102                                                                                                                                                                                                     | Unclassified       |
| rs4607103  | <i>ADAMTS9</i>     | C/T | 0.077                                               | -0.010                                                | 0.074                                                | 0.039                                                                                                                                                                                                    | 0.025                                                                                                                                                                                                     | Unclassified       |
| rs4457053  | <i>ZBED3</i>       | G/A | 0.122                                               | 0.000                                                 | 0.089                                                | 0.095                                                                                                                                                                                                    | 0.094                                                                                                                                                                                                     | Unclassified       |
| rs9470794  | <i>ZFAND3</i>      | C/T | -0.010                                              | 0.113                                                 | <b>-0.01</b> <sup>c</sup>                            | 0.058                                                                                                                                                                                                    | 0.036                                                                                                                                                                                                     | Unclassified       |
| rs864745   | <i>JAZF1</i>       | T/C | 0.113                                               | 0.058                                                 | 0.095                                                | 0.095                                                                                                                                                                                                    | 0.080                                                                                                                                                                                                     | Unclassified       |
| rs896854   | <i>TP53INP1</i>    | T/C | 0.086                                               | 0.068                                                 | 0.050                                                | 0.077                                                                                                                                                                                                    | 0.063                                                                                                                                                                                                     | Unclassified       |
| rs17584499 | <i>PTPRD</i>       | T/C | 0.000                                               | 0.086                                                 | <b>0.000</b> <sup>c</sup>                            | 0.010                                                                                                                                                                                                    | 0.007                                                                                                                                                                                                     | Unclassified       |
| rs13292136 | <i>TLE4/CHCHD9</i> | C/T | 0.174                                               | -0.010                                                | <b>0.174</b>                                         | 0.104                                                                                                                                                                                                    | 0.098                                                                                                                                                                                                     | Unclassified       |
| rs10906115 | <i>CDC123</i>      | A/G | 0.058                                               | 0.082                                                 | 0.033                                                | 0.068                                                                                                                                                                                                    | 0.073                                                                                                                                                                                                     | Unclassified       |
| rs1802295  | <i>VPS26A</i>      | T/G | 0.020                                               | 0.010                                                 | 0.003                                                | 0.049                                                                                                                                                                                                    | 0.043                                                                                                                                                                                                     | Unclassified       |
| rs10886471 | <i>GRK5</i>        | C/T | -0.010                                              | 0.058                                                 | <b>-0.01</b> <sup>c</sup>                            | 0.010                                                                                                                                                                                                    | 0.008                                                                                                                                                                                                     | Unclassified       |
| rs7961581  | <i>TSPAN8/LGR5</i> | C/T | 0.077                                               | 0.010                                                 | <b>0.077</b>                                         | 0.058                                                                                                                                                                                                    | 0.050                                                                                                                                                                                                     | Unclassified       |
| rs7403531  | <i>RASGRP1</i>     | T/C | 0.020                                               | 0.077                                                 | <b>0.02</b> <sup>c</sup>                             | 0.020                                                                                                                                                                                                    | 0.024                                                                                                                                                                                                     | Unclassified       |
| rs7178572  | <i>HMG20A</i>      | G/A | 0.077                                               | 0.086                                                 | 0.072                                                | 0.086                                                                                                                                                                                                    | 0.080                                                                                                                                                                                                     | Unclassified       |
| rs11634397 | <i>ZFAND6</i>      | G/A | 0.086                                               | 0.000                                                 | 0.047                                                | 0.068                                                                                                                                                                                                    | 0.060                                                                                                                                                                                                     | Unclassified       |
| rs9939609  | <i>FTO</i>         | A/T | 0.104                                               | 0.119                                                 | 0.113                                                | 0.095                                                                                                                                                                                                    | 0.105                                                                                                                                                                                                     | Unclassified       |
| rs4523957  | <i>SRR</i>         | T/G | 0.000                                               | 0.030                                                 | <b>0.00</b> <sup>c</sup>                             | 0.020                                                                                                                                                                                                    | 0.005                                                                                                                                                                                                     | Unclassified       |
| rs12970134 | <i>MC4R</i>        | A/G | 0.077                                               | 0.070                                                 | 0.075                                                | 0.077                                                                                                                                                                                                    | 0.072                                                                                                                                                                                                     | Unclassified       |

Proxies <sup>a</sup> rs11247991 ( $r^2=1$  with rs6815464 in CHB), <sup>b</sup> rs6819243 ( $r^2=0.966$  with rs6815464 in CHB)

Weights were calculated as natural-log(Odds Ratio)

Each variant's corresponding derived from:

DIAGRAM: DIAGRAMv3 GWAS meta-analysis

MetaboChip:DIAGRAM MetaboChip meta-analysis. <sup>c</sup> Effects of variants not included in metabochip were obtained from DIAGRAMv3 and highlighted in bold

AGEN-T2D: largest T2D-GWAS meta-analysis in East Asian, Asian Genetic Epidemiology Network-Type 2 Diabetes Consortium

TransEthnic: Trans-ethnic Meta analysis of four ethnic groups (East Asians[AGEN-T2D], Europeans [DIAGRAM], South Asians [SAT2D], and Mexicans [MAT2D])

TransEthnic+CKB: Meta-analysis of CKB and Trans-ethnic GWAS (East Asians[AGEN-T2D and CKB], Europeans [DIAGRAM], South Asians [SAT2D], and Mexicans [MAT2D])
