# Supplementary material for: Evaluation of type 2 diabetes genetic risk variants in Chinese adults: findings from 93,000 individuals from the China Kadoorie Biobank
Source: Springer Nature journal article supplement (doi:10.1007/s00125-016-3920-9), 2016-04-06
Supplement: MOESM4 [file 10017744]

**ESM Table 3 Statistical Power**

| SNP        | Nearby Genes       | RAF     | GWAS Study<br>Reported OR | Sample Size (n) |          | Power  |
|------------|--------------------|---------|---------------------------|-----------------|----------|--------|
|            |                    |         |                           | Cases           | Controls |        |
| rs10923931 | <i>NOTCH2</i>      | 0.03152 | 1.13 [1.08-1.17]          | 7,109           | 86,016   | 0.714  |
| rs340874   | <i>PROX1</i>       | 0.3908  | 1.07 [1.05-1.09]          | 7,105           | 86,001   | 0.967  |
| rs780094   | <i>GCKR</i>        | 0.4876  | 1.06 [1.04-1.08]          | 7,108           | 86,012   | 0.916  |
| rs7578597  | <i>THADA</i>       | 0.9926  | 1.15 [1.10-1.20]          | 7,109           | 86,022   | 0.2627 |
| rs243021   | <i>BCL11A</i>      | 0.6703  | 1.08 [1.06-1.10]          | 7,107           | 86,018   | 0.9846 |
| rs7593730  | <i>RBMS1</i>       | 0.8363  | 1.11 [1.08-1.16]          | 7,109           | 86,020   | 0.9914 |
| rs3923113  | <i>GRB14</i>       | 0.8658  | 1.09 [1.06-1.13]          | 7,107           | 85,981   | 0.9116 |
| rs2943641  | <i>IRS1</i>        | 0.9249  | 1.19 [1.13-1.25]          | 7,108           | 85,996   | 0.999  |
| rs1801282  | <i>PPARG</i>       | 0.9462  | 1.14 [1.08-1.20]          | 7,109           | 86,017   | 0.9072 |
| rs6780569  | <i>UBE2E2</i>      | 0.7983  | 1.21 [1.14-1.30]          | 7,108           | 86,019   | 0.999  |
| rs831571   | <i>PSMD6</i>       | 0.6336  | 1.09 [1.06-1.12]          | 7,105           | 85,989   | 0.9972 |
| rs4607103  | <i>ADAMTS9</i>     | 0.6382  | 1.09 [1.06-1.12]          | 7,107           | 86,007   | 0.9971 |
| rs11708067 | <i>ADCY5</i>       | 0.9966  | 1.12 [1.09-1.15]          | 7,109           | 86,018   | 0.1136 |
| rs1470579  | <i>IGF2BP2</i>     | 0.2574  | 1.14 [1.09-1.19]          | 7,108           | 86,000   | 0.9999 |
| rs16861329 | <i>ST64GAL1</i>    | 0.8093  | 1.09 [1.06-1.12]          | 7,108           | 85,990   | 0.969  |
| rs6815464  | <i>MAEA</i>        | 0.5775  | 1.13 [1.10-1.16]          | 7,101           | 85,981   | 0.9999 |
| rs10010131 | <i>WFS1</i>        | 0.9382  | 1.11 [1.05-1.16]          | 3,639           | 41,559   | 0.5186 |
| rs4457053  | <i>ZBED3</i>       | 0.05237 | 1.08 [1.06-1.11]          | 7,108           | 86,016   | 0.5173 |
| rs7754840  | <i>CDKALI</i>      | 0.4093  | 1.12 [1.08-1.16]          | 7,109           | 86,021   | 0.9999 |
| rs9470794  | <i>ZFAND3</i>      | 0.3161  | 1.12 [1.08-1.16]          | 7,109           | 86,002   | 0.9999 |
| rs2191349  | <i>DGKB</i>        | 0.6543  | 1.06 [1.04-1.08]          | 5,621           | 68,754   | 0.8034 |
| rs864745   | <i>JAZF1</i>       | 0.7661  | 1.10 [1.07-1.13]          | 7,107           | 86,013   | 0.9954 |
| rs4607517  | <i>GCK</i>         | 0.2107  | 1.07 [1.05-1.10]          | 7,107           | 86,006   | 0.892  |
| rs6467136  | <i>GCC1-PAX4</i>   | 0.7836  | 1.11 [1.07-1.14]          | 7,102           | 85,916   | 0.998  |
| rs972283   | <i>KLF14</i>       | 0.7104  | 1.07 [1.05-1.10]          | 7,109           | 86,017   | 0.9372 |
| rs896854   | <i>TP53INP1</i>    | 0.3084  | 1.06 [1.04-1.09]          | 7,109           | 86,018   | 0.8738 |
| rs13266634 | <i>SLC30A8</i>     | 0.5377  | 1.15 [1.12-1.19]          | 7,054           | 85,481   | 0.9999 |
| rs7041847  | <i>GLIS3</i>       | 0.4629  | 1.10 [1.07-1.13]          | 7,074           | 85,634   | 0.9998 |
| rs17584499 | <i>PTPRD</i>       | 0.1011  | 1.57 [1.36-1.82]          | 7,100           | 85,919   | 0.9999 |
| rs10811661 | <i>CDKN2A/B</i>    | 0.5428  | 1.20 [1.12-1.28]          | 7,106           | 85,956   | 0.9999 |
| rs13292136 | <i>TLE4/CHCHD9</i> | 0.9089  | 1.11 [1.07-1.15]          | 7,108           | 86,010   | 0.9199 |
| rs10906115 | <i>CDC123</i>      | 0.6257  | 1.13 [1.08-1.18]          | 7,103           | 85,973   | 0.9999 |
| rs1802295  | <i>VPS26A</i>      | 0.1093  | 1.08 [1.05-1.12]          | 7,106           | 85,942   | 0.799  |
| rs1111875  | <i>HHEX/IDE</i>    | 0.2791  | 1.13 [1.09-1.17]          | 7,105           | 85,988   | 0.9999 |
| rs7901695  | <i>TCF7L2</i>      | 0.031   | 1.41 [1.26-1.58]          | 7,046           | 85,319   | 0.9999 |
| rs10886471 | <i>GRK5</i>        | 0.7942  | 1.12 [1.08-1.16]          | 6,436           | 77,659   | 0.9984 |
| rs4752781  | <i>DUSP8/INS</i>   | 0.8328  | 1.35                      | 7,094           | 85,838   | -      |
| rs2237892  | <i>KCNQ1</i>       | 0.6764  | 1.40 [1.34-1.47]          | 7,095           | 85,896   | 0.9999 |
| rs5215     | <i>KCNJ11</i>      | 0.3861  | 1.14 [1.10-1.19]          | 7,109           | 86,011   | 0.9999 |
| rs1552224  | <i>ARAP1</i>       | 0.9161  | 1.14 [1.11-1.17]          | 7,108           | 86,022   | 0.9814 |
| rs10830963 | <i>MTNR1B</i>      | 0.4276  | 1.09 [1.06-1.12]          | 7,107           | 86,000   | 0.9984 |
| rs1531343  | <i>HMGA2</i>       | 0.09761 | 1.10 [1.07-1.14]          | 7,028           | 85,161   | 0.9087 |
| rs7961581  | <i>TSPAN8/LGR5</i> | 0.2147  | 1.09 [1.06-1.12]          | 7,107           | 86,007   | 0.9843 |
| rs1359790  | <i>SPRY2</i>       | 0.7159  | 1.15 [1.10-1.20]          | 7,108           | 85,988   | 0.9999 |
| rs7403531  | <i>RASGRP1</i>     | 0.3503  | 1.10 [1.06-1.13]          | 6,434           | 77,641   | 0.9988 |
| rs7172432  | <i>VPSI3C</i>      | 0.6182  | 1.11 [1.08-1.14]          | 7,108           | 85,987   | 0.9999 |
| rs7178572  | <i>HMG20A</i>      | 0.3496  | 1.09 [1.06-1.12]          | 7,109           | 86,018   | 0.9973 |
| rs11634397 | <i>ZFAND6</i>      | 0.08822 | 1.06 [1.04-1.08]          | 7,106           | 86,009   | 0.484  |
| rs2028299  | <i>AP3S2</i>       | 0.2017  | 1.10 [1.07-1.13]          | 7,108           | 86,007   | 0.9937 |
| rs8042680  | <i>PRCI</i>        | 0.9898  | 1.07 [1.05-1.09]          | 7,109           | 86,019   | 0.1194 |
| rs9939609  | <i>FTO</i>         | 0.1235  | 1.15 [1.09-1.23]          | 7,107           | 86,016   | 0.9997 |
| rs4523957  | <i>SRR</i>         | 0.7074  | 1.28 [1.18-1.39]          | 6,906           | 83,757   | 0.9999 |
| rs4430796  | <i>HNF1B</i>       | 0.2786  | 1.14 [1.08-1.20]          | 7,105           | 85,984   | 0.9999 |
| rs12970134 | <i>MC4R</i>        | 0.1881  | 1.08 [1.05-1.11]          | 7,100           | 85,952   | 0.9372 |
| rs6017317  | <i>FITM2-HNF4</i>  | 0.4263  | 1.09 [1.07-1.12]          | 7,108           | 86,015   | 0.9984 |
| rs5945326  | <i>DUSP9</i>       | 0.6049  | 1.27 [1.18-1.37]          | 7,091           | 85,888   | 0.9999 |

The statistical power shown in the table were calculated for association of each SNP with diabetes using the odds ratio reported in the original studies and sample size and risk allele frequencies in CKB study under an additive model. Power calculations were performed using odds ratios reported in the original GWAS and sample size and risk allele frequencies of our study with Quanto software (<http://biostats.usc.edu/Quanto.html>).
