# Supplementary material for: Evaluation of type 2 diabetes genetic risk variants in Chinese adults: findings from 93,000 individuals from the China Kadoorie Biobank
Source: Springer Nature journal article supplement (doi:10.1007/s00125-016-3920-9), 2016-04-06
Supplement: MOESM5 [file 10017744]

**ESM Table 4 Heterogeneity of the genetic effect estimates between 10 different regional centre**

| CHR | SNP        | Nearby Genes I <sup>2</sup> | <sup>a</sup> <i>P</i> <sub>heterogeneity</sub> | Direction         |
|-----|------------|-----------------------------|------------------------------------------------|-------------------|
| 1   | rs10923931 | <i>NOTCH2</i>               | 2.10                                           | 0.4192 ++++++++   |
| 1   | rs340874   | <i>PROX1</i>                | 0.00                                           | 0.7609 ++++++++   |
| 2   | rs780094   | <i>GCKR</i>                 | 23.00                                          | 0.2319 ++++++++   |
| 2   | rs7578597  | <i>THADA</i>                | 33.00                                          | 0.1443 +-----+    |
| 2   | rs243021   | <i>BCL11A</i>               | 43.00                                          | 0.0711 +++-+++++  |
| 2   | rs7593730  | <i>RBMS1</i>                | 0.00                                           | 0.5492 -+-+-----  |
| 2   | rs3923113  | <i>GRB14</i>                | 0.00                                           | 0.4811 -++++-+--  |
| 2   | rs2943641  | <i>IRS1</i>                 | 42.80                                          | 0.0728 +++-+----+ |
| 3   | rs1801282  | <i>PPARG</i>                | 0.00                                           | 0.4714 +++++-+--+ |
| 3   | rs6780569  | <i>UBE2E2</i>               | 0.00                                           | 0.9791 ++++++++   |
| 3   | rs831571   | <i>PSMD6</i>                | 22.50                                          | 0.2359 +-+-----+  |
| 3   | rs4607103  | <i>ADAMTS9</i>              | 47.30                                          | 0.0477 -++++-+--  |
| 3   | rs11708067 | <i>ADCY5</i>                | 0.00                                           | 0.5730 ++++++++   |
| 3   | rs1470579  | <i>IGF2BP2</i>              | 15.90                                          | 0.2971 ++++++++   |
| 3   | rs16861329 | <i>ST6GALI</i>              | 0.00                                           | 0.6314 ++++++++   |
| 4   | rs6815464  | <i>MAEA</i>                 | 1.60                                           | 0.4238 ++++++++   |
| 4   | rs10010131 | <i>WFS1</i>                 | 21.90                                          | 0.2418 +++++-+--  |
| 5   | rs4457053  | <i>ZBED3</i>                | 53.10                                          | 0.0238 -+++++++   |
| 6   | rs7754840  | <i>CDKALI</i>               | 31.70                                          | 0.1546 ++++++++   |
| 6   | rs9470794  | <i>ZFAND3</i>               | 0.00                                           | 0.9912 +-----+    |
| 7   | rs2191349  | <i>DGKB</i>                 | 0.00                                           | 0.6700 -+-+-----  |
| 7   | rs864745   | <i>JAZF1</i>                | 34.40                                          | 0.1323 -+-+-----  |
| 7   | rs4607517  | <i>GCK</i>                  | 57.30                                          | 0.0123 +-+-----+  |
| 7   | rs6467136  | <i>GCC1-PAX4</i>            | 0.00                                           | 0.7055 -++++-+--  |
| 7   | rs972283   | <i>KLF14</i>                | 0.00                                           | 0.6760 +-+-----+  |
| 8   | rs896854   | <i>TP53INP1</i>             | 0.00                                           | 0.9596 ++++++++   |
| 8   | rs13266634 | <i>SLC30A8</i>              | 0.00                                           | 0.6537 ++++++++   |
| 9   | rs7041847  | <i>GLIS3</i>                | 0.00                                           | 0.4806 -++++-+--  |
| 9   | rs17584499 | <i>PTPRD</i>                | 0.00                                           | 0.8164 ----+----- |
| 9   | rs10811661 | <i>CDKN2A/B</i>             | 59.80                                          | 0.0077 ++++++++   |
| 9   | rs13292136 | <i>TLE4/CHCHD</i>           | 19.60                                          | 0.2626 +++++-+--  |
| 10  | rs10906115 | <i>CDC123</i>               | 12.40                                          | 0.3289 ++++++++   |
| 10  | rs1802295  | <i>VPS26A</i>               | 0.00                                           | 0.4613 -++++-+--  |
| 10  | rs1111875  | <i>HHEX/IDE</i>             | 0.00                                           | 0.5640 ++++++++   |
| 10  | rs7901695  | <i>TCF7L2</i>               | 0.00                                           | 0.5540 ++++++++   |
| 10  | rs10886471 | <i>GRK5</i>                 | 13.10                                          | 0.3228 -+-+-----  |
| 11  | rs4752781  | <i>DUSP8/INS</i>            | 22.70                                          | 0.2342 -+-+-----  |
| 11  | rs2237892  | <i>KCNQ1</i>                | 50.20                                          | 0.0344 ++++++++   |
| 11  | rs5215     | <i>KCNJ11</i>               | 0.00                                           | 0.6773 +++++-+--  |
| 11  | rs1552224  | <i>ARAP1</i>                | 0.00                                           | 0.5431 +-----+    |
| 11  | rs10830963 | <i>MTNR1B</i>               | 34.30                                          | 0.1339 +-+-----+  |
| 12  | rs1531343  | <i>HMG2A</i>                | 0.00                                           | 0.7304 +-+-----+  |
| 12  | rs7961581  | <i>TSPAN8/LGR5</i>          | 0.00                                           | 0.9621 +-+-----+  |
| 13  | rs1359790  | <i>SPRY2</i>                | 19.20                                          | 0.2659 -+-+-----  |
| 15  | rs7403531  | <i>RASGRP1</i>              | 4.00                                           | 0.4030 +-+-----+  |
| 15  | rs7172432  | <i>VPS13C</i>               | 24.50                                          | 0.2182 -+-+-----  |
| 15  | rs7178572  | <i>HMG20A</i>               | 0.00                                           | 0.8611 ++++++++   |
| 15  | rs11634397 | <i>ZFAND6</i>               | 0.00                                           | 0.7386 +-+-----   |
| 15  | rs2028299  | <i>AP3S2</i>                | 0.00                                           | 0.9898 +++++-+--  |
| 15  | rs8042680  | <i>PRC1</i>                 | 6.60                                           | 0.3812 -+-+-----  |
| 16  | rs9939609  | <i>FTO</i>                  | 0.00                                           | 0.4839 ++++++++   |
| 17  | rs4523957  | <i>SRR</i>                  | 56.40                                          | 0.0143 ----+----- |
| 17  | rs4430796  | <i>HNF1B</i>                | 18.90                                          | 0.2687 ++++++++   |
| 18  | rs12970134 | <i>MC4R</i>                 | 0.00                                           | 0.4380 +++++-+--  |
| 20  | rs6017317  | <i>HNF4A</i>                | 0.00                                           | 0.8093 +++++-+--  |
| 23  | rs5945326  | <i>DUSP9</i>                | 0.00                                           | 0.4421 ++++++++   |

<sup>a</sup>Evidence of heterogeneity ( $P < 0.05 / 59 = 8.5E-04$ )
