# Supplementary material for: Evaluation of type 2 diabetes genetic risk variants in Chinese adults: findings from 93,000 individuals from the China Kadoorie Biobank
Source: Springer Nature journal article supplement (doi:10.1007/s00125-016-3920-9), 2016-04-06
Supplement: MOESM6 [file 10017744]

**ESM Table 5 Associations with diabetes after adjusting for BMI**

| SNP        | Nearby Genes       | R/A | Adjusted for age, sex, region<br>and BMI |                       |
|------------|--------------------|-----|------------------------------------------|-----------------------|
|            |                    |     | OR[95%CI]                                | <i>p</i>              |
| rs10923931 | <i>NOTCH2</i>      | T/G | 1.17[1.07-1.29]                          | 1.1x10 <sup>-3</sup>  |
| rs340874   | <i>PROX1</i>       | C/T | 1.05[1.02-1.09]                          | 3.9x10 <sup>-3</sup>  |
| rs780094   | <i>GCKR</i>        | C/T | 1.08[1.04-1.11]                          | 4.4x10 <sup>-5</sup>  |
| rs7578597  | <i>THADA</i>       | T/C | 1.27[1.00-1.60]                          | 4.7x10 <sup>-2</sup>  |
| rs243021   | <i>BCL11A</i>      | A/G | 1.07[1.03-1.12]                          | 2.1x10 <sup>-4</sup>  |
| rs7593730  | <i>RBMS1</i>       | C/T | 0.98[0.93-1.02]                          | 3.3x10 <sup>-1</sup>  |
| rs3923113  | <i>GRB14</i>       | A/C | 1.01[0.96-1.06]                          | 7.8x10 <sup>-1</sup>  |
| rs2943641  | <i>IRS1</i>        | C/T | 1.05[0.98-1.12]                          | 1.7x10 <sup>-1</sup>  |
| rs1801282  | <i>PPARG</i>       | C/G | 1.07[0.99-1.16]                          | 7.6x10 <sup>-2</sup>  |
| rs6780569  | <i>UBE2E2</i>      | G/A | 1.12[1.07-1.17]                          | 4.8x10 <sup>-7</sup>  |
| rs831571   | <i>PSMD6</i>       | C/T | 1.06[1.02-1.10]                          | 2.0x10 <sup>-3</sup>  |
| rs4607103  | <i>ADAMTS9</i>     | C/T | 1.01[0.97-1.05]                          | 6.7x10 <sup>-1</sup>  |
| rs11708067 | <i>ADCY5</i>       | A/G | 1.98[1.31-2.97]                          | 1.1x10 <sup>-3</sup>  |
| rs1470579  | <i>IGF2BP2</i>     | C/A | 1.12[1.08-1.17]                          | 1.6x10 <sup>-8</sup>  |
| rs16861329 | <i>ST6GAL1</i>     | C/G | 1.05[1.00-1.09]                          | 5.5x10 <sup>-2</sup>  |
| rs6815464  | <i>MAEA</i>        | C/G | 1.08[1.04-1.12]                          | 1.3x10 <sup>-5</sup>  |
| rs10010131 | <i>WFS1</i>        | G/A | 1.05[0.95-1.17]                          | 3.3x10 <sup>-1</sup>  |
| rs4457053  | <i>ZBED3</i>       | G/A | 1.11[1.03-1.20]                          | 9.3x10 <sup>-3</sup>  |
| rs7754840  | <i>CDKAL1</i>      | C/G | 1.24[1.19-1.28]                          | 2.8x10 <sup>-31</sup> |
| rs9470794  | <i>ZFAND3</i>      | C/T | 1.02[0.98-1.06]                          | 3.3x10 <sup>-1</sup>  |
| rs2191349  | <i>DGKB</i>        | T/G | 1.05[1.00-1.09]                          | 3.2x10 <sup>-2</sup>  |
| rs864745   | <i>JAZF1</i>       | T/C | 1.05[1.01-1.09]                          | 2.5x10 <sup>-2</sup>  |
| rs4607517  | <i>GCK</i>         | A/G | 1.01[0.97-1.06]                          | 5.2x10 <sup>-1</sup>  |
| rs6467136  | <i>GCC1-PAX4</i>   | G/A | 1.04[0.99-1.08]                          | 1.1x10 <sup>-1</sup>  |
| rs972283   | <i>KLF14</i>       | G/A | 1.05[1.01-1.09]                          | 1.6x10 <sup>-2</sup>  |
| rs896854   | <i>TP53INP1</i>    | T/C | 1.04[1.00-1.08]                          | 3.4x10 <sup>-2</sup>  |
| rs13266634 | <i>SLC30A8</i>     | C/T | 1.10[1.07-1.14]                          | 4.9x10 <sup>-9</sup>  |
| rs7041847  | <i>GLIS3</i>       | A/G | 1.07[1.03-1.10]                          | 3.3x10 <sup>-4</sup>  |
| rs17584499 | <i>PTPRD</i>       | T/C | 1.01[0.95-1.07]                          | 8.6x10 <sup>-1</sup>  |
| rs10811661 | <i>CDKN2A/B</i>    | T/C | 1.24[1.19-1.28]                          | 2.4x10 <sup>-31</sup> |
| rs13292136 | <i>TLE4/CHCHD9</i> | C/T | 1.08[1.01-1.15]                          | 2.1x10 <sup>-2</sup>  |
| rs10906115 | <i>CDC123</i>      | A/G | 1.09[1.05-1.13]                          | 2.5x10 <sup>-6</sup>  |
| rs1802295  | <i>VPS26A</i>      | T/G | 1.02[0.97-1.08]                          | 4.0x10 <sup>-1</sup>  |
| rs1111875  | <i>HHEX/IDE</i>    | C/T | 1.12[1.08-1.17]                          | 4.8x10 <sup>-9</sup>  |
| rs7901695  | <i>TCF7L2</i>      | C/T | 1.40[1.27-1.53]                          | 7.1x10 <sup>-13</sup> |
| rs10886471 | <i>GRK5</i>        | C/T | 1.00[0.96-1.05]                          | 8.4x10 <sup>-1</sup>  |
| rs4752781  | <i>DUSP8/INS</i>   | T/A | 0.99[0.95-1.04]                          | 7.0x10 <sup>-1</sup>  |
| rs2237892  | <i>KCNQ1</i>       | C/T | 1.27[1.22-1.32]                          | 2.8x10 <sup>-32</sup> |
| rs5215     | <i>KCNJ11</i>      | C/T | 1.08[1.05-1.12]                          | 9.3x10 <sup>-6</sup>  |
| rs1552224  | <i>ARAP1</i>       | A/C | 1.10[1.03-1.17]                          | 5.1x10 <sup>-3</sup>  |
| rs10830963 | <i>MTNR1B</i>      | G/C | 1.02[0.99-1.06]                          | 2.1x10 <sup>-1</sup>  |
| rs1531343  | <i>HMGA2</i>       | C/G | 1.05[0.99-1.11]                          | 1.2x10 <sup>-1</sup>  |
| rs7961581  | <i>TSPAN8/LGR5</i> | C/T | 1.04[1.00-1.09]                          | 4.9x10 <sup>-2</sup>  |
| rs1359790  | <i>SPRY2</i>       | G/A | 1.06[1.02-1.10]                          | 5.5x10 <sup>-3</sup>  |
| rs7403531  | <i>RASGRP1</i>     | T/C | 1.03[1.00-1.08]                          | 8.2x10 <sup>-2</sup>  |
| rs7172432  | <i>VPS13C</i>      | A/G | 1.07[1.03-1.11]                          | 2.4x10 <sup>-4</sup>  |
| rs7178572  | <i>HMG20A</i>      | G/A | 1.07[1.04-1.11]                          | 1.4x10 <sup>-4</sup>  |
| rs11634397 | <i>ZFAND6</i>      | G/A | 1.02[0.96-1.09]                          | 5.2x10 <sup>-1</sup>  |
| rs2028299  | <i>AP3S2</i>       | C/A | 1.07[1.02-1.11]                          | 3.6x10 <sup>-3</sup>  |
| rs8042680  | <i>PRC1</i>        | A/C | 0.87[0.73-1.04]                          | 1.3x10 <sup>-1</sup>  |
| rs9939609  | <i>FTO</i>         | A/T | 1.11[1.05-1.16]                          | 1.4x10 <sup>-4</sup>  |
| rs4523957  | <i>SRR</i>         | T/G | 0.98[0.95-1.02]                          | 4.5x10 <sup>-1</sup>  |
| rs4430796  | <i>HNF1B</i>       | G/A | 1.10[1.06-1.14]                          | 1.7x10 <sup>-6</sup>  |
| rs12970134 | <i>MC4R</i>        | A/G | 1.03[0.99-1.08]                          | 1.3x10 <sup>-1</sup>  |
| rs6017317  | <i>HNF4A</i>       | G/T | 1.05[1.02-1.09]                          | 5.0x10 <sup>-3</sup>  |
| rs5945326  | <i>DUSP9</i>       | A/G | 1.11[1.07-1.16]                          | 2.3x10 <sup>-7</sup>  |
