# Supplementary material for: Evaluation of type 2 diabetes genetic risk variants in Chinese adults: findings from 93,000 individuals from the China Kadoorie Biobank
Source: Springer Nature journal article supplement (doi:10.1007/s00125-016-3920-9), 2016-04-06
Supplement: MOESM8 [file 10017744]

**ESM Table 7 Concordance of T2D risk alleles**

|                                                                                             | CKB<br>(56 variants overall)      |                                                |                            |                                            | East Asians:<br>Meta-analysis of CKB and AGEN-T2D<br>(55 variants overall) |                                             |                            |                                                                   |
|---------------------------------------------------------------------------------------------|-----------------------------------|------------------------------------------------|----------------------------|--------------------------------------------|----------------------------------------------------------------------------|---------------------------------------------|----------------------------|-------------------------------------------------------------------|
|                                                                                             | <sup>a</sup> EA GWAS<br>(15 loci) | <sup>b</sup> Others<br>Ancestries<br>(41 loci) | <sup>c</sup> Total<br>(56) | Binomial test <i>P</i><br>(CKB into Total) | <sup>a</sup> EA<br>GWAS<br>(15 loci)                                       | <sup>b</sup> Others Ancestries<br>(40 loci) | <sup>c</sup> Total<br>(55) | Binomial test <i>P</i><br>(CKB+AGEN-T2D into<br>Other Ancestries) |
| Directionally consistent                                                                    | 12                                | 36                                             | 48                         | 48/56, $P = 2.34 \times 10^{-8}$           | 14                                                                         | 37                                          | 51                         | 37/40, $P = 9.73 \times 10^{-9}$                                  |
| Nominal Significant                                                                         | 9                                 | 26                                             | 35                         | -                                          | 12                                                                         | 25                                          | 37                         | -                                                                 |
| Significant after correction for<br>multiple-testing using the<br>Holm-Bonferroni procedure | 6                                 | 13                                             | 19                         | -                                          | 11                                                                         | 18                                          | 29                         | -                                                                 |
| Genome-wide significant                                                                     | 1                                 | 4                                              | 5                          | -                                          | 9                                                                          | 10                                          | 19                         | -                                                                 |

Number of alleles are presented as <sup>a</sup> Reported in East Asians + <sup>b</sup> Others = <sup>c</sup> Total
