# Supplementary material for: Evaluation of type 2 diabetes genetic risk variants in Chinese adults: findings from 93,000 individuals from the China Kadoorie Biobank
Source: Springer Nature journal article supplement (doi:10.1007/s00125-016-3920-9), 2016-04-06
Supplement: MOESM9 [file 10017744]

**ESM Table 8 Multiple testing adjusted *P* values using different methods**

| CHR | SNP        | Nearby Genes       | R/A | Unadjusted             | Bonferroni               | Benjamini-Hochberg (FDR) | Holm-Bonferroni          | max ( <i>T</i> ) permutation (10000 times) |                              |
|-----|------------|--------------------|-----|------------------------|--------------------------|--------------------------|--------------------------|--------------------------------------------|------------------------------|
|     |            |                    |     |                        |                          |                          |                          | Empirical <i>p</i>                         | Corrected Empirical <i>p</i> |
| 1   | rs10923931 | <i>NOTCH2</i>      | T/G | 2.51x10 <sup>-3</sup>  | 1.41x10 <sup>-1</sup>    | 6.11x10 <sup>-3</sup> *  | 8.71x10 <sup>-2</sup>    | 2.40x10 <sup>-3</sup>                      | 1.76x10 <sup>-1</sup>        |
| 1   | rs340874   | <i>PROX1</i>       | C/T | 5.55x10 <sup>-3</sup>  | 3.11x10 <sup>-1</sup>    | 1.30x10 <sup>-2</sup> *  | 1.83x10 <sup>-1</sup>    | 5.10x10 <sup>-3</sup>                      | 3.31x10 <sup>-1</sup>        |
| 2   | rs780094   | <i>GCKR</i>        | C/T | 1.30x10 <sup>-5</sup>  | 7.25x10 <sup>-4</sup> *  | 5.60x10 <sup>-5</sup> *  | 5.70x10 <sup>-4</sup> *  | 1.00x10 <sup>-4</sup>                      | 1.60x10 <sup>-3</sup> *      |
| 2   | rs7578597  | <i>THADA</i>       | T/C | 4.36x10 <sup>-2</sup>  | 1                        | 7.10x10 <sup>-2</sup>    | 1                        | 3.98x10 <sup>-2</sup>                      | 9.45x10 <sup>-1</sup>        |
| 2   | rs243021   | <i>BCL11A</i>      | A/G | 3.36x10 <sup>-4</sup>  | 1.88x10 <sup>-2</sup> *  | 1.05x10 <sup>-3</sup> *  | 1.31x10 <sup>-2</sup> *  | 6.00x10 <sup>-4</sup>                      | 2.86x10 <sup>-2</sup> *      |
| 2   | rs7593730  | <i>RBMS1</i>       | C/T | 3.45x10 <sup>-1</sup>  | 1                        | 4.20x10 <sup>-1</sup>    | 1                        | 3.43x10 <sup>-1</sup>                      | 1                            |
| 2   | rs3923113  | <i>GRB14</i>       | A/C | 9.69x10 <sup>-1</sup>  | 1                        | 9.69x10 <sup>-1</sup>    | 1                        | 9.67x10 <sup>-1</sup>                      | 1                            |
| 2   | rs2943641  | <i>IRS1</i>        | C/T | 2.48x10 <sup>-1</sup>  | 1                        | 3.16x10 <sup>-1</sup>    | 1                        | 2.51x10 <sup>-1</sup>                      | 1                            |
| 3   | rs1801282  | <i>PPARG</i>       | C/G | 1.03x10 <sup>-1</sup>  | 1                        | 1.41x10 <sup>-1</sup>    | 1                        | 1.06x10 <sup>-1</sup>                      | 9.99x10 <sup>-1</sup>        |
| 3   | rs6780569  | <i>UBE2E2</i>      | G/A | 3.03x10 <sup>-6</sup>  | 1.70x10 <sup>-4</sup> *  | 1.70x10 <sup>-5</sup> *  | 1.42x10 <sup>-4</sup> *  | 1.00x10 <sup>-4</sup>                      | 6.00x10 <sup>-4</sup> *      |
| 3   | rs831571   | <i>PSMD6</i>       | C/T | 1.48x10 <sup>-3</sup>  | 8.28x10 <sup>-2</sup>    | 4.13x10 <sup>-3</sup> *  | 5.47x10 <sup>-2</sup>    | 1.20x10 <sup>-3</sup>                      | 1.10x10 <sup>-1</sup>        |
| 3   | rs4607103  | <i>ADAMTS9</i>     | C/T | 8.58x10 <sup>-1</sup>  | 1                        | 9.07x10 <sup>-1</sup>    | 1                        | 8.57x10 <sup>-1</sup>                      | 1                            |
| 3   | rs11708067 | <i>ADCY5</i>       | A/G | 1.55x10 <sup>-3</sup>  | 8.66x10 <sup>-2</sup>    | 4.13x10 <sup>-3</sup> *  | 5.57x10 <sup>-2</sup>    | 1.40x10 <sup>-3</sup>                      | 1.16x10 <sup>-1</sup>        |
| 3   | rs1470579  | <i>IGF2BP2</i>     | C/A | 1.06x10 <sup>-7</sup>  | 5.94x10 <sup>-6</sup> *  | 7.42x10 <sup>-7</sup> *  | 5.20x10 <sup>-6</sup> *  | 1.00x10 <sup>-4</sup>                      | 1.00x10 <sup>-4</sup> *      |
| 3   | rs16861329 | <i>ST6G4GAL1</i>   | C/G | 7.66x10 <sup>-2</sup>  | 1                        | 1.13x10 <sup>-1</sup>    | 1                        | 7.87x10 <sup>-2</sup>                      | 9.94x10 <sup>-1</sup>        |
| 4   | rs6815464  | <i>MAEA</i>        | C/G | 3.39x10 <sup>-5</sup>  | 1.90x10 <sup>-3</sup> *  | 1.36x10 <sup>-4</sup> *  | 1.46x10 <sup>-3</sup> *  | 1.00x10 <sup>-4</sup>                      | 3.10x10 <sup>-3</sup> *      |
| 4   | rs10010131 | <i>WFS1</i>        | G/A | 4.69x10 <sup>-1</sup>  | 1                        | 5.25x10 <sup>-1</sup>    | 1                        | 4.96x10 <sup>-1</sup>                      | 1                            |
| 5   | rs4457053  | <i>ZBED3</i>       | G/A | 1.64x10 <sup>-2</sup>  | 9.21x10 <sup>-1</sup>    | 3.17x10 <sup>-2</sup> *  | 4.60x10 <sup>-1</sup>    | 1.89x10 <sup>-2</sup>                      | 6.82x10 <sup>-1</sup>        |
| 6   | rs7754840  | <i>CDKAL1</i>      | C/G | 3.62x10 <sup>-27</sup> | 2.03x10 <sup>-25</sup> * | 6.76x10 <sup>-26</sup> * | 1.95x10 <sup>-25</sup> * | 1.00x10 <sup>-4</sup>                      | 1.00x10 <sup>-4</sup> *      |
| 6   | rs9470794  | <i>ZFAND3</i>      | C/T | 4.06x10 <sup>-1</sup>  | 1                        | 4.74x10 <sup>-1</sup>    | 1                        | 4.29x10 <sup>-1</sup>                      | 1                            |
| 7   | rs2191349  | <i>DGKB</i>        | T/G | 3.46x10 <sup>-2</sup>  | 1                        | 6.25x10 <sup>-2</sup>    | 8.98x10 <sup>-1</sup>    | 4.64x10 <sup>-2</sup>                      | 9.04x10 <sup>-1</sup>        |
| 7   | rs864745   | <i>JAZF1</i>       | T/C | 3.82x10 <sup>-2</sup>  | 1                        | 6.69x10 <sup>-2</sup>    | 9.56x10 <sup>-1</sup>    | 4.82x10 <sup>-2</sup>                      | 9.24x10 <sup>-1</sup>        |
| 7   | rs4607517  | <i>GCK</i>         | A/G | 5.51x10 <sup>-1</sup>  | 1                        | 6.05x10 <sup>-1</sup>    | 1                        | 5.63x10 <sup>-1</sup>                      | 1                            |
| 7   | rs6467136  | <i>GCCI1-PAX4</i>  | G/A | 6.46x10 <sup>-2</sup>  | 1                        | 1.00x10 <sup>-1</sup>    | 1                        | 7.53x10 <sup>-2</sup>                      | 9.87x10 <sup>-1</sup>        |
| 7   | rs972283   | <i>KLF14</i>       | G/A | 4.16x10 <sup>-2</sup>  | 1                        | 7.06x10 <sup>-2</sup>    | 9.98x10 <sup>-1</sup>    | 5.23x10 <sup>-2</sup>                      | 9.37x10 <sup>-1</sup>        |
| 8   | rs896854   | <i>TP53INP1</i>    | T/C | 4.44x10 <sup>-2</sup>  | 1                        | 7.10x10 <sup>-2</sup>    | 1                        | 5.36x10 <sup>-2</sup>                      | 9.48x10 <sup>-1</sup>        |
| 8   | rs13266634 | <i>SLC30A8</i>     | C/T | 3.41x10 <sup>-8</sup>  | 1.91x10 <sup>-6</sup> *  | 3.82x10 <sup>-7</sup> *  | 1.77x10 <sup>-6</sup> *  | 1.00x10 <sup>-4</sup>                      | 1.00x10 <sup>-4</sup> *      |
| 9   | rs7041847  | <i>GLIS3</i>       | A/G | 8.89x10 <sup>-4</sup>  | 1.62x10 <sup>-2</sup> *  | 9.52x10 <sup>-4</sup> *  | 1.16x10 <sup>-2</sup> *  | 1.20x10 <sup>-3</sup>                      | 2.47x10 <sup>-2</sup> *      |
| 9   | rs17584499 | <i>PTPRD</i>       | T/C | 9.33x10 <sup>-1</sup>  | 1                        | 9.50x10 <sup>-1</sup>    | 1                        | 9.37x10 <sup>-1</sup>                      | 1                            |
| 9   | rs10811661 | <i>CDKN2A/B</i>    | T/C | 7.09x10 <sup>-28</sup> | 3.97x10 <sup>-26</sup> * | 1.99x10 <sup>-26</sup> * | 3.90x10 <sup>-26</sup> * | 1.00x10 <sup>-4</sup>                      | 1.00x10 <sup>-4</sup> *      |
| 9   | rs13292136 | <i>TLE4/CHCHD9</i> | C/T | 2.18x10 <sup>-2</sup>  | 1                        | 4.07x10 <sup>-2</sup>    | 5.89x10 <sup>-1</sup>    | 2.38x10 <sup>-2</sup>                      | 7.76x10 <sup>-1</sup>        |
| 10  | rs10906115 | <i>CDC123</i>      | A/G | 1.08x10 <sup>-5</sup>  | 6.03x10 <sup>-4</sup> *  | 5.04x10 <sup>-5</sup> *  | 4.84x10 <sup>-4</sup> *  | 1.00x10 <sup>-4</sup>                      | 1.20x10 <sup>-3</sup> *      |
| 10  | rs1802295  | <i>VPS26A</i>      | T/C | 3.82x10 <sup>-1</sup>  | 1                        | 4.55x10 <sup>-1</sup>    | 1                        | 3.94x10 <sup>-1</sup>                      | 1                            |
| 10  | rs1111875  | <i>HHEX/IDE</i>    | C/T | 6.17x10 <sup>-8</sup>  | 3.46x10 <sup>-6</sup> *  | 4.94x10 <sup>-7</sup> *  | 3.09x10 <sup>-6</sup> *  | 1.00x10 <sup>-4</sup>                      | 1.00x10 <sup>-4</sup> *      |
| 10  | rs7901695  | <i>TCF7L2</i>      | C/T | 6.50x10 <sup>-12</sup> | 3.64x10 <sup>-10</sup> * | 9.10x10 <sup>-11</sup> * | 3.45x10 <sup>-10</sup> * | 1.00x10 <sup>-4</sup>                      | 1.00x10 <sup>-4</sup> *      |
| 10  | rs10886471 | <i>GRK5</i>        | C/T | 9.02x10 <sup>-1</sup>  | 1                        | 9.35x10 <sup>-1</sup>    | 1                        | 9.02x10 <sup>-1</sup>                      | 1                            |
| 11  | rs4752781  | <i>DUSP8/INS</i>   | T/A | 7.34x10 <sup>-1</sup>  | 1                        | 7.90x10 <sup>-1</sup>    | 1                        | 7.39x10 <sup>-1</sup>                      | 1                            |
| 11  | rs2237892  | <i>KCNQ1</i>       | C/T | 4.61x10 <sup>-30</sup> | 2.58x10 <sup>-28</sup> * | 2.58x10 <sup>-28</sup> * | 2.58x10 <sup>-28</sup> * | 1.00x10 <sup>-4</sup>                      | 1.00x10 <sup>-4</sup> *      |
| 11  | rs5215     | <i>KCNJ11</i>      | C/T | 7.85x10 <sup>-5</sup>  | 4.40x10 <sup>-3</sup> *  | 2.93x10 <sup>-4</sup> *  | 3.30x10 <sup>-3</sup> *  | 3.00x10 <sup>-4</sup>                      | 7.70x10 <sup>-3</sup> *      |
| 11  | rs1552224  | <i>ARAP1</i>       | A/C | 1.07x10 <sup>-2</sup>  | 5.98x10 <sup>-1</sup>    | 2.14x10 <sup>-2</sup> *  | 3.10x10 <sup>-1</sup>    | 1.54x10 <sup>-2</sup>                      | 5.33x10 <sup>-1</sup>        |
| 11  | rs10830963 | <i>MTNR1B</i>      | G/C | 2.04x10 <sup>-1</sup>  | 1                        | 2.66x10 <sup>-1</sup>    | 1                        | 2.58x10 <sup>-1</sup>                      | 1                            |
| 12  | rs1531343  | <i>HMGA2</i>       | C/G | 9.92x10 <sup>-2</sup>  | 1                        | 1.39x10 <sup>-1</sup>    | 1                        | 1.11x10 <sup>-1</sup>                      | 9.99x10 <sup>-1</sup>        |
| 12  | rs7961581  | <i>TSPAN8/LGR5</i> | C/T | 7.09x10 <sup>-2</sup>  | 1                        | 1.07x10 <sup>-1</sup>    | 1                        | 8.15x10 <sup>-2</sup>                      | 9.92x10 <sup>-1</sup>        |
| 13  | rs1359790  | <i>SPRY2</i>       | G/A | 2.49x10 <sup>-3</sup>  | 1.39x10 <sup>-1</sup>    | 6.11x10 <sup>-3</sup> *  | 8.71x10 <sup>-2</sup>    | 3.60x10 <sup>-3</sup>                      | 1.76x10 <sup>-1</sup>        |
| 15  | rs7403531  | <i>RASGRP1</i>     | T/C | 9.27x10 <sup>-2</sup>  | 1                        | 1.33x10 <sup>-1</sup>    | 1                        | 1.29x10 <sup>-1</sup>                      | 9.98x10 <sup>-1</sup>        |
| 15  | rs7172432  | <i>VPS13C</i>      | A/G | 4.32x10 <sup>-4</sup>  | 2.42x10 <sup>-2</sup> *  | 1.27x10 <sup>-3</sup> *  | 1.64x10 <sup>-2</sup> *  | 8.00x10 <sup>-4</sup>                      | 3.64x10 <sup>-2</sup> *      |
| 15  | rs7178572  | <i>HMG20A</i>      | G/A | 1.25x10 <sup>-4</sup>  | 7.00x10 <sup>-3</sup> *  | 4.38x10 <sup>-4</sup> *  | 5.13x10 <sup>-3</sup> *  | 2.00x10 <sup>-4</sup>                      | 1.15x10 <sup>-2</sup> *      |
| 15  | rs11634397 | <i>ZFAND6</i>      | G/A | 4.46x10 <sup>-1</sup>  | 1                        | 5.10x10 <sup>-1</sup>    | 1                        | 4.44x10 <sup>-1</sup>                      | 1                            |
| 15  | rs2028299  | <i>AP3S2</i>       | C/A | 6.04x10 <sup>-3</sup>  | 3.38x10 <sup>-1</sup>    | 1.35x10 <sup>-2</sup> *  | 1.93x10 <sup>-1</sup>    | 6.60x10 <sup>-3</sup>                      | 3.52x10 <sup>-1</sup>        |
| 15  | rs8042680  | <i>PRC1</i>        | A/C | 1.45x10 <sup>-1</sup>  | 1                        | 1.93x10 <sup>-1</sup>    | 1                        | 1.43x10 <sup>-1</sup>                      | 1                            |
| 16  | rs9939609  | <i>FTO</i>         | A/T | 5.41x10 <sup>-8</sup>  | 3.03x10 <sup>-6</sup> *  | 4.94x10 <sup>-7</sup> *  | 2.76x10 <sup>-6</sup> *  | 1.00x10 <sup>-4</sup>                      | 1.00x10 <sup>-4</sup> *      |
| 17  | rs4523957  | <i>SRR</i>         | T/G | 3.23x10 <sup>-1</sup>  | 1                        | 4.02x10 <sup>-1</sup>    | 1                        | 3.26x10 <sup>-1</sup>                      | 1                            |
| 17  | rs4430796  | <i>HNF1B</i>       | G/A | 3.81x10 <sup>-6</sup>  | 2.13x10 <sup>-4</sup> *  | 1.94x10 <sup>-5</sup> *  | 1.75x10 <sup>-4</sup> *  | 1.00x10 <sup>-4</sup>                      | 6.00x10 <sup>-4</sup> *      |
| 18  | rs12970134 | <i>MC4R</i>        | A/G | 6.76x10 <sup>-3</sup>  | 3.79x10 <sup>-1</sup>    | 1.46x10 <sup>-2</sup> *  | 2.10x10 <sup>-1</sup>    | 7.30x10 <sup>-3</sup>                      | 3.81x10 <sup>-1</sup>        |
| 20  | rs6017317  | <i>HNF4A</i>       | G/T | 9.94x10 <sup>-3</sup>  | 5.56x10 <sup>-1</sup>    | 2.06x10 <sup>-2</sup> *  | 2.98x10 <sup>-1</sup>    | 1.11x10 <sup>-2</sup>                      | 5.08x10 <sup>-1</sup>        |
| 23  | rs5945326  | <i>DUSP9</i>       | A/G | 4.08x10 <sup>-7</sup>  | 2.28x10 <sup>-5</sup> *  | 2.54x10 <sup>-6</sup> *  | 1.96x10 <sup>-5</sup> *  | 1.00x10 <sup>-4</sup>                      | 1.00x10 <sup>-4</sup> *      |

\**p* < 0.05 after adjustment for multiple comparisons using the Bonferroni, Benjamini-Hochberg (false discovery rate), Holm-Bonferroni procedure or 10000 times-max (*T*) permutation
