# Supplementary material for: Evaluation of type 2 diabetes genetic risk variants in Chinese adults: findings from 93,000 individuals from the China Kadoorie Biobank
Source: Springer Nature journal article supplement (doi:10.1007/s00125-016-3920-9), 2016-04-06
Supplement: MOESM10 [file 10017744]

ESM Table 9 Heterogeneity in allelic effects between Chinese, East Asians and Europeans

| CHR | SNP        | Nearby Genes | R/A | OR[95%CI]                                         |                                                         |                                                                                               |                                                                            |                                                                                                        | P for heterogeneity   |                       | Reported Population |
|-----|------------|--------------|-----|---------------------------------------------------|---------------------------------------------------------|-----------------------------------------------------------------------------------------------|----------------------------------------------------------------------------|--------------------------------------------------------------------------------------------------------|-----------------------|-----------------------|---------------------|
|     |            |              |     | CKB<br>[Up to 7,109 cases and<br>86,022 controls] | AGEN-T2D<br>[Up to 25,079 cases<br>and 29,611 controls] | Meta-analysis of<br>CKB+AGEN-T2D <sup>a</sup><br>[up to 32,188 cases and<br>115,633 controls] | <sup>b</sup> DIAGRAMv3 (EU)<br>[up to 12,171 cases<br>and 56,862 controls] | Meta-analysis of<br>CKB+Trans-ethnic GWAS <sup>c</sup><br>[up to 33,597 cases and<br>201,655 controls] | CKB vs.<br>DIAGRAMv3  | Meta vs.<br>DIAGRAMv3 |                     |
| 1   | rs10923931 | NOTCH2       | T/G | 1.16[1.05-1.27]                                   | 1.00[0.86-1.16]                                         | 1.11[1.02-1.20]                                                                               | 1.10[1.05-1.16]                                                            | 1.06[1.03-1.10]                                                                                        | 3.93x10 <sup>-1</sup> | 9.17x10 <sup>-1</sup> | EU                  |
| 1   | rs340874   | PROX1        | C/T | 1.05[1.01-1.09]                                   | 1.08[1.03-1.14]                                         | 1.06[1.03-1.09]                                                                               | 1.08[1.04-1.12]                                                            | 1.06[1.04-1.08]                                                                                        | 3.24x10 <sup>-1</sup> | 5.05x10 <sup>-1</sup> | EU                  |
| 2   | rs780094   | GCKR         | C/T | 1.08[1.04-1.12]                                   | 1.06[1.01-1.11]                                         | 1.07[1.04-1.10]                                                                               | 1.04[1.00-1.08]                                                            | 1.07[1.04-1.09]                                                                                        | 1.41x10 <sup>-1</sup> | 1.90x10 <sup>-1</sup> | EU                  |
| 2   | rs7578597  | THADA        | T/C | 1.27[1.01-1.60]                                   | 0.93[0.62-1.40]                                         | 1.18[0.96-1.44]                                                                               | 1.14[1.08-1.22]                                                            | 1.08[1.03-1.13]                                                                                        | 4.14x10 <sup>-1</sup> | 8.18x10 <sup>-1</sup> | EU                  |
| 2   | rs243021   | BCL11A       | A/G | 1.07[1.03-1.11]                                   | 1.05[1.00-1.10]                                         | 1.06[1.03-1.09]                                                                               | 1.09[1.05-1.13]                                                            | 1.07[1.05-1.09]                                                                                        | 5.23x10 <sup>-1</sup> | 2.98x10 <sup>-1</sup> | EU                  |
| 2   | rs7593730  | RBMS1        | C/T | 0.98[0.93-1.02]                                   | 1.00[0.94-1.07]                                         | 0.99[0.95-1.02]                                                                               | 1.11[1.06-1.15]                                                            | 1.03[1.00-1.06]                                                                                        | 1.22x10 <sup>-4</sup> | 7.05x10 <sup>-5</sup> | * EU                |
| 2   | rs3923113  | GRB14        | A/C | 1.00[0.95-1.05]                                   | 1.03[0.95-1.12]                                         | 1.01[0.97-1.05]                                                                               | 1.04[1.00-1.08]                                                            | 1.05[1.02-1.08]                                                                                        | 2.51x10 <sup>-1</sup> | 3.26x10 <sup>-1</sup> | SA                  |
| 2   | rs2943641  | IRS1         | C/T | 1.04[0.97-1.11]                                   | 1.12[1.03-1.22]                                         | 1.07[1.02-1.13]                                                                               | 1.08[1.04-1.12]                                                            | 1.08[1.05-1.12]                                                                                        | 3.55x10 <sup>-1</sup> | 8.21x10 <sup>-1</sup> | EU                  |
| 3   | rs1801282  | PPARG        | C/G | 1.07[0.99-1.16]                                   | 1.15[1.01-1.30]                                         | 1.09[1.02-1.16]                                                                               | 1.16[1.11-1.22]                                                            | 1.12[1.08-1.17]                                                                                        | 6.74x10 <sup>-2</sup> | 1.14x10 <sup>-1</sup> | EU                  |
| 3   | rs6780569  | UBE2E2       | G/A | 1.11[1.06-1.16]                                   | 1.17[1.12-1.22]                                         | 1.14[1.10-1.18]                                                                               | 1.09[1.02-1.15]                                                            | 1.11[1.08-1.14]                                                                                        | 4.85x10 <sup>-1</sup> | 1.40x10 <sup>-1</sup> | EA                  |
| 3   | rs831571   | PSMD6        | C/T | 1.06[1.02-1.10]                                   | 1.09[1.05-1.13]                                         | 1.08[1.05-1.11]                                                                               | 1.03[0.99-1.08]                                                            | 1.05[1.03-1.08]                                                                                        | 3.78x10 <sup>-1</sup> | 1.13x10 <sup>-1</sup> | EA                  |
| 3   | rs4607103  | ADAMTS9      | C/T | 1.00[0.97-1.04]                                   | 0.99[0.95-1.04]                                         | 1.00[0.97-1.03]                                                                               | 1.08[1.04-1.12]                                                            | 1.03[1.00-1.05]                                                                                        | 5.77x10 <sup>-3</sup> | 1.27x10 <sup>-3</sup> | EU                  |
| 3   | rs11708067 | ADCY5        | A/G | 1.92[1.28-2.88]                                   | 1.18[0.80-1.74]                                         | 1.49[1.13-1.97]                                                                               | 1.10[1.06-1.15]                                                            | 1.11[1.07-1.15]                                                                                        | 7.53x10 <sup>-3</sup> | 3.75x10 <sup>-2</sup> | EU                  |
| 3   | rs1470579  | IGF2BP2      | C/A | 1.11[1.07-1.16]                                   | 1.15[1.11-1.19]                                         | 1.13[1.10-1.16]                                                                               | 1.12[1.08-1.16]                                                            | 1.12[1.10-1.15]                                                                                        | 7.97x10 <sup>-1</sup> | 6.38x10 <sup>-1</sup> | EU                  |
| 3   | rs16861329 | ST6GAL1      | C/G | 1.04[1.00-1.09]                                   | 0.92[0.86-0.99]                                         | 1.01[0.97-1.04]                                                                               | 1.03[0.97-1.09]                                                            | 1.07[1.04-1.10]                                                                                        | 7.37x10 <sup>-1</sup> | 5.31x10 <sup>-1</sup> | SA                  |
| 4   | rs6815464  | MAEA         | C/G | 1.08[1.04-1.12]                                   | 1.13[1.10-1.16]                                         | 1.11[1.07-1.13]                                                                               | 1.12[1.01-1.24]                                                            | 1.05[1.02-1.08]                                                                                        | 4.94x10 <sup>-1</sup> | 8.85x10 <sup>-1</sup> | EA                  |
| 4   | rs10010131 | WFS1         | G/A | 1.04[0.94-1.15]                                   | 1.00[0.91-1.10]                                         | 1.02[0.95-1.09]                                                                               | 1.10[1.06-1.14]                                                            | 1.09[1.06-1.12]                                                                                        | 3.06x10 <sup>-1</sup> | 5.48x10 <sup>-2</sup> | EU                  |
| 5   | rs4457053  | ZBED3        | G/A | 1.10[1.02-1.18]                                   | 1.00[0.85-1.18]                                         | 1.08[1.01-1.16]                                                                               | 1.13[1.08-1.19]                                                            | 1.10[1.06-1.14]                                                                                        | 4.79x10 <sup>-1</sup> | 2.57x10 <sup>-1</sup> | EU                  |
| 6   | rs7754840  | CDKAL1       | C/G | 1.21[1.07-1.26]                                   | 1.18[1.14-1.22]                                         | 1.20[1.17-1.23]                                                                               | 1.15[1.11-1.19]                                                            | 1.17[1.15-1.20]                                                                                        | 3.06x10 <sup>-2</sup> | 6.39x10 <sup>-2</sup> | EU                  |
| 6   | rs9470794  | ZFAND3       | C/T | 1.02[0.98-1.05]                                   | 1.12[1.08-1.16]                                         | 1.07[1.04-1.10]                                                                               | 0.99[0.93-1.05]                                                            | 1.04[1.01-1.07]                                                                                        | 4.49x10 <sup>-1</sup> | 2.47x10 <sup>-2</sup> | EA                  |
| 7   | rs2191349  | DGKB         | T/G | 1.05[1.00-1.09]                                   | 1.12[1.08-1.17]                                         | 1.09[1.06-1.12]                                                                               | 1.07[1.03-1.11]                                                            | 1.08[1.05-1.10]                                                                                        | 4.35x10 <sup>-1</sup> | 5.15x10 <sup>-1</sup> | EU                  |
| 7   | rs864745   | JAZF1        | T/C | 1.04[1.00-1.09]                                   | 1.06[1.00-1.12]                                         | 1.05[1.01-1.09]                                                                               | 1.12[1.08-1.15]                                                            | 1.08[1.06-1.11]                                                                                        | 1.51x10 <sup>-2</sup> | 1.04x10 <sup>-2</sup> | EU                  |
| 7   | rs4607517  | GCK          | A/G | 1.01[0.97-1.06]                                   | 1.03[0.97-1.09]                                         | 1.02[0.98-1.05]                                                                               | 1.05[1.00-1.10]                                                            | 1.03[1.00-1.05]                                                                                        | 2.86x10 <sup>-1</sup> | 3.24x10 <sup>-1</sup> | EU                  |
| 7   | rs6467136  | GCC1-PAX4    | G/A | 1.04[1.00-1.09]                                   | 1.11[1.07-1.14]                                         | 1.08[1.05-1.11]                                                                               | 0.99[0.95-1.02]                                                            | 1.02[1.00-1.04]                                                                                        | 5.13x10 <sup>-2</sup> | 2.28x10 <sup>-5</sup> | * EA                |
| 7   | rs972283   | KLF14        | G/A | 1.04[1.00-1.08]                                   | 0.99[0.93-1.06]                                         | 1.03[0.99-1.06]                                                                               | 1.10[1.06-1.14]                                                            | 1.05[1.02-1.07]                                                                                        | 4.42x10 <sup>-2</sup> | 7.98x10 <sup>-3</sup> | EU                  |
| 8   | rs896854   | TP53INP1     | T/C | 1.04[1.00-1.08]                                   | 1.07[1.02-1.12]                                         | 1.05[1.02-1.08]                                                                               | 1.09[1.05-1.13]                                                            | 1.07[1.04-1.09]                                                                                        | 7.94x10 <sup>-2</sup> | 1.33x10 <sup>-1</sup> | EU                  |
| 8   | rs13266634 | SLC30A8      | C/T | 1.10[1.06-1.13]                                   | 1.10[1.07-1.14]                                         | 1.10[1.07-1.13]                                                                               | 1.16[1.11-1.22]                                                            | 1.12[1.10-1.15]                                                                                        | 4.51x10 <sup>-2</sup> | 3.98x10 <sup>-2</sup> | EU                  |
| 9   | rs7041847  | GLIS3        | A/G | 1.07[1.03-1.10]                                   | 1.10[1.07-1.13]                                         | 1.09[1.06-1.11]                                                                               | 1.05[1.01-1.09]                                                            | 1.06[1.04-1.08]                                                                                        | 5.36x10 <sup>-1</sup> | 1.14x10 <sup>-1</sup> | EA                  |
| 9   | rs17584499 | PTPRD        | T/C | 1.00[0.95-1.06]                                   | 1.09[1.00-1.19]                                         | 1.03[0.98-1.08]                                                                               | 1.00[0.95-1.06]                                                            | 1.01[0.97-1.04]                                                                                        | 9.80x10 <sup>-1</sup> | 5.03x10 <sup>-1</sup> | EA                  |
| 9   | rs10811661 | CDKN2A/B     | T/C | 1.22[1.18-1.26]                                   | 1.12[1.07-1.16]                                         | 1.17[1.14-1.21]                                                                               | 1.18[1.13-1.23]                                                            | 1.21[1.18-1.24]                                                                                        | 2.36x10 <sup>-1</sup> | 8.50x10 <sup>-1</sup> | EU                  |
| 9   | rs13292136 | TLE4/CHCHD9  | C/T | 1.08[1.01-1.14]                                   | 0.99[0.92-1.07]                                         | 1.04[0.99-1.09]                                                                               | 1.19[1.11-1.27]                                                            | 1.10[1.07-1.14]                                                                                        | 3.04x10 <sup>-2</sup> | 1.84x10 <sup>-3</sup> | EU                  |
| 10  | rs10906115 | CDC123       | A/G | 1.08[1.05-1.12]                                   | 1.08[1.05-1.13]                                         | 1.08[1.06-1.11]                                                                               | 1.06[1.02-1.10]                                                            | 1.08[1.05-1.10]                                                                                        | 3.72x10 <sup>-1</sup> | 3.07x10 <sup>-1</sup> | EA                  |
| 10  | rs1802295  | VPS26A       | T/C | 1.03[0.97-1.08]                                   | 1.01[0.94-1.09]                                         | 1.02[0.98-1.07]                                                                               | 1.02[0.98-1.06]                                                            | 1.04[1.02-1.07]                                                                                        | 8.68x10 <sup>-1</sup> | 9.68x10 <sup>-1</sup> | SA                  |
| 10  | rs1111875  | HHEX/IDE     | C/T | 1.11[1.07-1.15]                                   | 1.08[1.04-1.13]                                         | 1.10[1.07-1.13]                                                                               | 1.15[1.11-1.18]                                                            | 1.12[1.09-1.14]                                                                                        | 2.41x10 <sup>-1</sup> | 5.15x10 <sup>-2</sup> | EU                  |
| 10  | rs7901695  | TCF7L2       | C/T | 1.37[1.25-1.50]                                   | 1.18[1.03-1.35]                                         | 1.31[1.21-1.41]                                                                               | 1.37[1.32-1.42]                                                            | 1.32[1.28-1.35]                                                                                        | 9.80x10 <sup>-1</sup> | 2.90x10 <sup>-1</sup> | EU                  |
| 10  | rs10886471 | GRK5         | C/T | 1.00[0.96-1.05]                                   | 1.06[0.99-1.13]                                         | 1.02[0.98-1.06]                                                                               | 0.99[0.95-1.03]                                                            | 1.01[0.98-1.03]                                                                                        | 6.95x10 <sup>-1</sup> | 2.96x10 <sup>-1</sup> | EA                  |
| 11  | rs4752781  | DUSP8/INS    | T/A | 0.99[0.95-1.04]                                   | 1.04[0.98-1.10]                                         | 1.01[0.97-1.05]                                                                               | 1.04[1.01-1.08]                                                            | 1.03[1.00-1.05]                                                                                        | 7.73x10 <sup>-2</sup> | 1.81x10 <sup>-1</sup> | EU                  |
| 11  | rs2237892  | KCNQ1        | C/T | 1.25[1.20-1.30]                                   | 1.19[1.14-1.24]                                         | 1.22[1.19-1.26]                                                                               | 1.12[1.04-1.21]                                                            | 1.23[1.20-1.27]                                                                                        | 1.17x10 <sup>-2</sup> | 3.88x10 <sup>-2</sup> | EA                  |
| 11  | rs5215     | KCNJ11       | C/T | 1.07[1.04-1.11]                                   | 1.10[1.06-1.14]                                         | 1.09[1.06-1.11]                                                                               | 1.08[1.05-1.12]                                                            | 1.08[1.06-1.10]                                                                                        | 7.05x10 <sup>-1</sup> | 9.17x10 <sup>-1</sup> | EU                  |
| 11  | rs1552224  | ARAP1        | A/C | 1.09[1.02-1.16]                                   | 1.16[1.05-1.28]                                         | 1.11[1.05-1.17]                                                                               | 1.13[1.08-1.19]                                                            | 1.10[1.06-1.14]                                                                                        | 3.18x10 <sup>-1</sup> | 5.50x10 <sup>-1</sup> | EU                  |
| 11  | rs10830963 | MTNR1B       | G/C | 1.02[0.99-1.06]                                   | 1.00[0.93-1.08]                                         | 1.02[0.99-1.05]                                                                               | 1.11[1.07-1.16]                                                            | 1.06[1.03-1.08]                                                                                        | 1.81x10 <sup>-3</sup> | 6.95x10 <sup>-4</sup> | EU                  |
| 12  | rs1531343  | HMG2A        | C/G | 1.05[0.99-1.11]                                   | 1.06[0.99-1.14]                                         | 1.05[1.01-1.10]                                                                               | 1.15[1.09-1.22]                                                            | 1.08[1.05-1.12]                                                                                        | 2.02x10 <sup>-2</sup> | 1.40x10 <sup>-2</sup> | EU                  |
| 12  | rs7961581  | TSPAN8/LGR5  | C/T | 1.04[1.00-1.08]                                   | 1.01[0.95-1.06]                                         | 1.03[0.99-1.06]                                                                               | 1.08[1.04-1.12]                                                            | 1.05[1.03-1.07]                                                                                        | 1.88x10 <sup>-1</sup> | 4.65x10 <sup>-2</sup> | EU                  |
| 13  | rs1359790  | SPRY2        | G/A | 1.06[1.02-1.10]                                   | 1.05[1.01-1.10]                                         | 1.06[1.03-1.09]                                                                               | 1.10[1.06-1.14]                                                            | 1.07[1.04-1.09]                                                                                        | 2.06x10 <sup>-1</sup> | 9.87x10 <sup>-2</sup> | EA                  |
| 15  | rs7403531  | RASGRP1      | T/C | 1.03[0.99-1.07]                                   | 1.08[1.02-1.13]                                         | 1.05[1.02-1.08]                                                                               | 1.02[0.98-1.06]                                                            | 1.02[1.00-1.05]                                                                                        | 6.23x10 <sup>-1</sup> | 2.81x10 <sup>-1</sup> | EA                  |
| 15  | rs7172432  | VPS13C       | A/G | 1.07[1.03-1.11]                                   | 1.11[1.07-1.15]                                         | 1.09[1.06-1.11]                                                                               | 1.06[1.02-1.10]                                                            | 1.07[1.05-1.09]                                                                                        | 7.82x10 <sup>-1</sup> | 2.68x10 <sup>-1</sup> | EA                  |
| 15  | rs7178572  | HMG20A       | G/A | 1.07[1.04-1.11]                                   | 1.09[1.04-1.14]                                         | 1.08[1.05-1.11]                                                                               | 1.08[1.04-1.12]                                                            | 1.08[1.06-1.11]                                                                                        | 8.48x10 <sup>-1</sup> | 9.90x10 <sup>-1</sup> | SA                  |
| 15  | rs11634397 | ZFAND6       | G/A | 1.02[0.96-1.09]                                   | 1.00[0.90-1.11]                                         | 1.02[0.97-1.07]                                                                               | 1.09[1.05-1.13]                                                            | 1.06[1.03-1.09]                                                                                        | 9.09x10 <sup>-2</sup> | 3.89x10 <sup>-2</sup> | EU                  |
| 15  | rs2028299  | AP3S2        | C/A | 1.06[1.02-1.11]                                   | 1.08[1.02-1.14]                                         | 1.07[1.03-1.11]                                                                               | 1.04[1.00-1.09]                                                            | 1.07[1.04-1.09]                                                                                        | 5.81x10 <sup>-1</sup> | 4.15x10 <sup>-1</sup> | SA                  |
| 15  | rs8042680  | PRCI         | A/C | 0.88[0.74-1.05]                                   | 1.64[1.16-2.32]                                         | 1.00[0.85-1.16]                                                                               | 1.07[1.04-1.11]                                                            | 1.06[1.04-1.09]                                                                                        | 2.59x10 <sup>-2</sup> | 3.50x10 <sup>-1</sup> | EU                  |
| 16  | rs9939609  | FTO          | A/T | 1.15[1.09-1.21]                                   | 1.13[1.07-1.18]                                         | 1.14[1.10-1.18]                                                                               | 1.11[1.07-1.14]                                                            | 1.11[1.08-1.14]                                                                                        | 1.68x10 <sup>-1</sup> | 2.12x10 <sup>-1</sup> | EU                  |
| 17  | rs4523957  | SRR          | T/G | 0.98[0.94-1.02]                                   | 1.03[0.97-1.09]                                         | 0.99[0.96-1.03]                                                                               | 1.00[0.96-1.04]                                                            | 1.00[0.98-1.03]                                                                                        | 4.74x10 <sup>-1</sup> | 8.24x10 <sup>-1</sup> | EA                  |
| 17  | rs4430796  | HNF1B        | G/A | 1.09[1.05-1.14]                                   | 1.12[1.05-1.19]                                         | 1.10[1.07-1.14]                                                                               | 1.13[1.07-1.19]                                                            | 1.10[1.07-1.13]                                                                                        | 3.54x10 <sup>-1</sup> | 4.30x10 <sup>-1</sup> | EU                  |
| 18  | rs12970134 | MC4R         | A/G | 1.06[1.02-1.11]                                   | 1.07[1.02-1.12]                                         | 1.07[1.03-1.10]                                                                               | 1.08[1.04-1.12]                                                            | 1.07[1.05-1.10]                                                                                        | 5.94x10 <sup>-1</sup> | 6.49x10 <sup>-1</sup> | EU                  |
| 20  | rs6017317  | HNF4A        | G/T | 1.05[1.01-1.08]                                   | 1.09[1.07-1.12]                                         | 1.08[1.06-1.10]                                                                               | 1.06[1.01-1.12]                                                            | 1.06[1.04-1.08]                                                                                        | 6.31x10 <sup>-1</sup> | 5.75x10 <sup>-1</sup> | EA                  |
| 23  | rs5945326  | DUSP9        | A/G | 1.11[1.07-1.15]                                   | NA                                                      | NA                                                                                            | NA                                                                         | NA                                                                                                     | NA                    | NA                    | EU                  |

Meta: Meta-analysis of AGEN-T2D and CKB study; EU: Europeans; SA: South Asians; EA: East Asians; CKB: China Kadoorie Biobank

<sup>a</sup>AGEN-T2D: T2D-GWAS meta-analysis in East Asian ; <sup>b</sup>DIAGRAM: DIAbetes Genetics Replication And Meta-analysis

<sup>c</sup>Trans-ethnic GWAS: Trans-ethnic Meta analysis of four ethnic groups (East Asians[AGEN-T2D], Europeans [DIAGRAM], South Asians [SAT2D], and Mexicans [MAT2D])

Reference(PMID): <sup>a</sup>22158537; <sup>b</sup>22885922; <sup>c</sup>24509480; \* SNPs showing nominal evidence of heterogeneity ( $p < 0.05/110 = 0.00045$ )
