# Supplementary material for: Evaluation of type 2 diabetes genetic risk variants in Chinese adults: findings from 93,000 individuals from the China Kadoorie Biobank
Source: Springer Nature journal article supplement (doi:10.1007/s00125-016-3920-9), 2016-04-06
Supplement: MOESM12 [file 10017744]

**ESM Table 11 Comparison of effect size and discriminative ability of the GRSs for risk of diabetes**

| <b>GRS</b>       | <b>Weights</b>                               | <b>AUC</b>         | <b><i>p</i></b>       |
|------------------|----------------------------------------------|--------------------|-----------------------|
| GRS-T(52SNPs)    |                                              |                    |                       |
|                  | Unweighted                                   | 0.574[0.567-0.580] | ref                   |
|                  | AGEN-T2D                                     | 0.582[0.575-0.589] | 6.8x10 <sup>-5</sup>  |
|                  | DIAGRAMv3                                    | 0.584[0.577-0.591] | 1.4x10 <sup>-7</sup>  |
|                  | MetaboChip                                   | 0.588[0.581-0.595] | 6.4x10 <sup>-12</sup> |
|                  | TransEthnic                                  | 0.590[0.583-0.597] | 3.6x10 <sup>-20</sup> |
|                  | TransEthnic+CKB                              | 0.593[0.586-0.600] | 4.3x10 <sup>-23</sup> |
|                  | TransEthnic+CKB (1000-fold cross-validation) | 0.591[0.584-0.598] | 1.8x10 <sup>-19</sup> |
| GRS-BC (25 SNPs) |                                              |                    |                       |
|                  | Unweighted                                   | 0.569[0.562-0.576] | ref                   |
|                  | AGEN-T2D                                     | 0.576[0.570-0.583] | 7.6x10 <sup>-3</sup>  |
|                  | DIAGRAMv3                                    | 0.577[0.570-0.584] | 7.2x10 <sup>-6</sup>  |
|                  | MetaboChip                                   | 0.580[0.573-0.587] | 2.1x10 <sup>-9</sup>  |
|                  | TransEthnic                                  | 0.581[0.574-0.588] | 2.0x10 <sup>-14</sup> |
|                  | TransEthnic+CKB                              | 0.583[0.576-0.590] | 3.6x10 <sup>-15</sup> |
|                  | TransEthnic+CKB (1000-fold cross-validation) | 0.582[0.575-0.589] | 1.5x10 <sup>-13</sup> |
| GRS-IR (7 SNPs)  |                                              |                    |                       |
|                  | Unweighted                                   | 0.521[0.514-0.527] | ref                   |
|                  | AGEN-T2D                                     | 0.521[0.514-0.528] | 0.996                 |
|                  | DIAGRAMv3                                    | 0.518[0.511-0.525] | 0.187                 |
|                  | MetaboChip                                   | 0.520[0.513-0.527] | 0.749                 |
|                  | TransEthnic                                  | 0.520[0.514-0.527] | 0.907                 |
|                  | TransEthnic+CKB                              | 0.522[0.515-0.529] | 0.176                 |
|                  | TransEthnic+CKB (1000-fold cross-validation) | 0.520[0.513-0.527] | 0.343                 |

The range of all GRSs were rescaled in the range of unweighted GRS-T  
P-value derived from DeLong test compared to unweighted GRS model
