# Supplementary material for: Evaluation of type 2 diabetes genetic risk variants in Chinese adults: findings from 93,000 individuals from the China Kadoorie Biobank
Source: Springer Nature journal article supplement (doi:10.1007/s00125-016-3920-9), 2016-04-06
Supplement: MOESM13 [file 10017744]

**ESM Table 12 Association of genetic risk scores with diabetes risks in CKB**

| GRS    | Weighting   | Continuous GRS  |                         | Quartiles of GRS |                 |                 |                 |                         |
|--------|-------------|-----------------|-------------------------|------------------|-----------------|-----------------|-----------------|-------------------------|
|        |             | OR [95%CI]      | <i>p</i>                | Q1 (reference)   | Q2              | Q3              | Q4              | <i>p</i> for trend      |
| GRS-T  |             |                 |                         |                  |                 |                 |                 |                         |
|        | Unweighted  | 1.07[1.06-1.08] | 8.94x10 <sup>-109</sup> | 1.00[0.94-1.06]  | 1.33[1.26-1.40] | 1.61[1.53-1.69] | 2.03[1.95-2.13] | 6.76x10 <sup>-90</sup>  |
|        | AGEN-T2D    | 1.07[1.06-1.07] | 1.75x10 <sup>-125</sup> | 1.00[0.94-1.06]  | 1.36[1.29-1.43] | 1.62[1.54-1.70] | 2.22[2.13-2.32] | 2.75x10 <sup>-111</sup> |
|        | DIAGRAMv3   | 1.07[1.07-1.08] | 1.38x10 <sup>-138</sup> | 1.00[0.94-1.06]  | 1.30[1.24-1.37] | 1.57[1.50-1.65] | 2.23[2.14-2.33] | 2.36x10 <sup>-115</sup> |
|        | MetaboChip  | 1.07[1.07-1.08] | 4.26x10 <sup>-146</sup> | 1.00[0.94-1.06]  | 1.35[1.28-1.42] | 1.65[1.57-1.73] | 2.32[2.22-2.42] | 4.67x10 <sup>-125</sup> |
|        | TransEthnic | 1.08[1.07-1.08] | 4.63x10 <sup>-155</sup> | 1.00[0.94-1.06]  | 1.33[1.27-1.41] | 1.67[1.59-1.75] | 2.34[2.25-2.45] | 5.25x10 <sup>-130</sup> |
| GRS-BC |             |                 |                         |                  |                 |                 |                 |                         |
|        | Unweighted  | 1.09[1.08-1.10] | 9.65x10 <sup>-93</sup>  | 1.00[0.95-1.05]  | 1.27[1.21-1.34] | 1.51[1.43-1.58] | 1.97[1.88-2.07] | 2.04x10 <sup>-85</sup>  |
|        | AGEN-T2D    | 1.09[1.08-1.10] | 4.83x10 <sup>-102</sup> | 1.00[0.94-1.06]  | 1.19[1.13-1.25] | 1.50[1.43-1.57] | 2.00[1.92-2.09] | 8.04x10 <sup>-94</sup>  |
|        | DIAGRAMv3   | 1.10[1.09-1.10] | 5.55x10 <sup>-116</sup> | 1.00[0.94-1.06]  | 1.25[1.19-1.32] | 1.46[1.39-1.53] | 2.07[1.99-2.16] | 2.67x10 <sup>-96</sup>  |
|        | MetaboChip  | 1.10[1.09-1.11] | 9.17x10 <sup>-123</sup> | 1.00[0.94-1.06]  | 1.27[1.20-1.33] | 1.56[1.49-1.64] | 2.12[2.03-2.21] | 9.30x10 <sup>-104</sup> |
|        | TransEthnic | 1.10[1.09-1.11] | 2.28x10 <sup>-126</sup> | 1.00[0.94-1.06]  | 1.27[1.21-1.34] | 1.61[1.53-1.69] | 2.17[2.08-2.26] | 4.82x10 <sup>-111</sup> |
| GRS-IR |             |                 |                         |                  |                 |                 |                 |                         |
|        | Unweighted  | 1.05[1.03-1.07] | 5.97x10 <sup>-9</sup>   | 1.00[0.95-1.05]  | 1.10[1.05-1.16] | 1.14[1.08-1.19] | 1.22[1.16-1.29] | 3.46x10 <sup>-8</sup>   |
|        | AGEN-T2D    | 1.04[1.03-1.06] | 1.47x10 <sup>-7</sup>   | 1.00[0.95-1.05]  | 1.05[1.00-1.11] | 1.13[1.07-1.18] | 1.15[1.10-1.21] | 5.46x10 <sup>-6</sup>   |
|        | DIAGRAMv3   | 1.05[1.03-1.07] | 1.56x10 <sup>-6</sup>   | 1.00[0.95-1.05]  | 1.13[1.07-1.18] | 1.13[1.08-1.19] | 1.19[1.13-1.25] | 5.31x10 <sup>-6</sup>   |
|        | MetaboChip  | 1.06[1.04-1.08] | 2.75x10 <sup>-7</sup>   | 1.00[0.95-1.05]  | 1.11[1.06-1.17] | 1.17[1.11-1.23] | 1.19[1.14-1.25] | 3.26x10 <sup>-7</sup>   |
|        | TransEthnic | 1.06[1.04-1.08] | 7.051x10 <sup>-8</sup>  | 1.00[0.95-1.05]  | 1.08[1.03-1.13] | 1.14[1.09-1.20] | 1.19[1.14-1.25] | 1.68x10 <sup>-7</sup>   |
