# Supplementary material for: Evaluation of type 2 diabetes genetic risk variants in Chinese adults: findings from 93,000 individuals from the China Kadoorie Biobank
Source: Springer Nature journal article supplement (doi:10.1007/s00125-016-3920-9), 2016-04-06
Supplement: MOESM14 [file 10017744]

**ESM Table 13 Proportion of variance in phenotype explained by GRSs**

| <b>GRS</b> | <b>HOMA-B</b> | <b>HOMA-IR</b> |
|------------|---------------|----------------|
| GRS-B      | 0.94%         | 0.13%          |
| GRS-IR     | 0.03%         | 0.15%          |
