# Supplementary material for: Evaluation of type 2 diabetes genetic risk variants in Chinese adults: findings from 93,000 individuals from the China Kadoorie Biobank
Source: Springer Nature journal article supplement (doi:10.1007/s00125-016-3920-9), 2016-04-06
Supplement: MOESM15 [file 10017744]

ESM Table 14 GRSs-obesity interaction effects on risk of diabetes

| GRS                | Weighting   | BMI              |                  |                  |                               |                                   | Waist Circumference |                 |                 |                               |                                   | Waist-Hip Ratio |                 |                 |                               |                                   | Percent Body Fat |                 |                 |                               |                                   |
|--------------------|-------------|------------------|------------------|------------------|-------------------------------|-----------------------------------|---------------------|-----------------|-----------------|-------------------------------|-----------------------------------|-----------------|-----------------|-----------------|-------------------------------|-----------------------------------|------------------|-----------------|-----------------|-------------------------------|-----------------------------------|
|                    |             | Normal weight    | Overweight       | Obese            | <i>P</i> interaction (Strata) | <i>P</i> interaction (Continuous) | Low                 | Medium          | High            | <i>P</i> interaction (Strata) | <i>P</i> interaction (Continuous) | Low             | Medium          | High            | <i>P</i> interaction (Strata) | <i>P</i> interaction (Continuous) | Low              | Medium          | High            | <i>P</i> interaction (Strata) | <i>P</i> interaction (Continuous) |
| Cases/Controls (n) |             | 1,978 / 39,862   | 3,386 / 35,711   | 1,745 / 10,438   |                               |                                   | 1,067 / 30,046      | 2,017 / 29,075  | 4,025 / 26,890  |                               |                                   | 1,016 / 30,035  | 2,370 / 32,074  | 3,723 / 23,902  |                               |                                   | 1,392 / 29,852   | 2,180 / 28,727  | 3,533 / 27,369  |                               |                                   |
| GRS-T              | Unweighted  | 1.09 [1.08-1.10] | 1.07 [1.06-1.08] | 1.05 [1.04-1.07] | 9.21x10 <sup>-4</sup> *       | 7.03x10 <sup>-4</sup> *           | 1.10[1.08-1.12]     | 1.08[1.06-1.09] | 1.06[1.05-1.07] | 1.47x10 <sup>-4</sup> *       | 1.78x10 <sup>-3</sup> *           | 1.10[1.08-1.12] | 1.07[1.06-1.08] | 1.06[1.05-1.07] | 2.39x10 <sup>-4</sup> *       | 3.02x10 <sup>-4</sup> *           | 1.09[1.08-1.11]  | 1.07[1.06-1.08] | 1.06[1.05-1.07] | 8.28x10 <sup>-4</sup> *       | 6.29x10 <sup>-2</sup> *           |
|                    | AGEN-T2D    | 1.08 [1.07-1.09] | 1.07 [1.06-1.07] | 1.05 [1.04-1.06] | 2.18x10 <sup>-4</sup> *       | 2.52x10 <sup>-4</sup> *           | 1.09[1.08-1.11]     | 1.07[1.06-1.08] | 1.06[1.05-1.07] | 5.31x10 <sup>-5</sup> *       | 6.48x10 <sup>-4</sup> *           | 1.09[1.08-1.11] | 1.07[1.06-1.08] | 1.05[1.05-1.06] | 1.09x10 <sup>-6</sup> *       | 6.08x10 <sup>-5</sup> *           | 1.09[1.08-1.11]  | 1.06[1.05-1.07] | 1.06[1.05-1.07] | 3.06x10 <sup>-5</sup> *       | 2.30x10 <sup>-2</sup> *           |
|                    | DIAGRAMv3   | 1.10 [1.09-1.11] | 1.08 [1.07-1.09] | 1.05 [1.04-1.07] | 3.19x10 <sup>-6</sup> *       | 5.28x10 <sup>-6</sup> *           | 1.11[1.09-1.12]     | 1.08[1.07-1.09] | 1.06[1.06-1.07] | 4.29x10 <sup>-6</sup> *       | 1.08x10 <sup>-4</sup> *           | 1.11[1.09-1.13] | 1.08[1.07-1.09] | 1.06[1.05-1.07] | 8.23x10 <sup>-7</sup> *       | 6.70x10 <sup>-5</sup> *           | 1.10[1.09-1.11]  | 1.08[1.07-1.09] | 1.06[1.06-1.07] | 2.36x10 <sup>-5</sup> *       | 1.94x10 <sup>-3</sup> *           |
|                    | MetaboChip  | 1.10 [1.09-1.11] | 1.08 [1.07-1.09] | 1.06 [1.04-1.07] | 1.01x10 <sup>-5</sup> *       | 1.00x10 <sup>-5</sup> *           | 1.11[1.09-1.12]     | 1.08[1.07-1.09] | 1.07[1.06-1.07] | 7.70x10 <sup>-6</sup> *       | 1.47x10 <sup>-4</sup> *           | 1.11[1.10-1.13] | 1.08[1.07-1.09] | 1.06[1.06-1.07] | 1.26x10 <sup>-6</sup> *       | 1.88x10 <sup>-4</sup> *           | 1.10[1.09-1.11]  | 1.08[1.07-1.09] | 1.07[1.06-1.07] | 7.75x10 <sup>-5</sup> *       | 1.88x10 <sup>-3</sup> *           |
|                    | TransEthnic | 1.10 [1.09-1.11] | 1.08 [1.07-1.09] | 1.06 [1.05-1.07] | 1.45x10 <sup>-5</sup> *       | 1.17x10 <sup>-5</sup> *           | 1.11[1.10-1.13]     | 1.08[1.07-1.09] | 1.07[1.06-1.08] | 9.08x10 <sup>-6</sup> *       | 2.60x10 <sup>-4</sup> *           | 1.11[1.10-1.13] | 1.08[1.07-1.09] | 1.07[1.06-1.07] | 1.38x10 <sup>-6</sup> *       | 1.19x10 <sup>-4</sup> *           | 1.10[1.09-1.12]  | 1.08[1.07-1.09] | 1.07[1.06-1.08] | 2.86x10 <sup>-5</sup> *       | 4.74x10 <sup>-3</sup> *           |
| GRS-BC             | Unweighted  | 1.12 [1.10-1.14] | 1.09 [1.08-1.10] | 1.08 [1.06-1.10] | 1.81x10 <sup>-3</sup> *       | 1.17x10 <sup>-3</sup> *           | 1.13[1.11-1.16]     | 1.09[1.08-1.11] | 1.08[1.07-1.09] | 4.32x10 <sup>-4</sup> *       | 1.19x10 <sup>-2</sup> *           | 1.13[1.11-1.15] | 1.10[1.09-1.12] | 1.08[1.06-1.09] | 1.32x10 <sup>-4</sup> *       | 2.95x10 <sup>-3</sup> *           | 1.12[1.10-1.14]  | 1.10[1.08-1.11] | 1.08[1.07-1.09] | 1.45x10 <sup>-3</sup> *       | 3.35x10 <sup>-2</sup> *           |
|                    | AGEN-T2D    | 1.12 [1.11-1.14] | 1.09 [1.08-1.11] | 1.08 [1.06-1.10] | 1.90x10 <sup>-3</sup> *       | 2.08x10 <sup>-3</sup> *           | 1.14[1.12-1.16]     | 1.10[1.08-1.11] | 1.08[1.07-1.10] | 3.07x10 <sup>-4</sup> *       | 4.91x10 <sup>-3</sup> *           | 1.14[1.11-1.16] | 1.11[1.10-1.13] | 1.07[1.06-1.09] | 1.60x10 <sup>-6</sup> *       | 2.47x10 <sup>-4</sup> *           | 1.13[1.11-1.15]  | 1.10[1.08-1.11] | 1.08[1.07-1.10] | 1.24x10 <sup>-3</sup> *       | 4.81x10 <sup>-2</sup> *           |
|                    | DIAGRAMv3   | 1.13 [1.12-1.15] | 1.10 [1.08-1.11] | 1.07 [1.06-1.09] | 1.17x10 <sup>-5</sup> *       | 4.71x10 <sup>-6</sup> *           | 1.15[1.13-1.17]     | 1.10[1.08-1.12] | 1.09[1.07-1.10] | 9.85x10 <sup>-6</sup> *       | 4.02x10 <sup>-4</sup> *           | 1.14[1.12-1.17] | 1.11[1.09-1.12] | 1.08[1.07-1.09] | 4.15x10 <sup>-6</sup> *       | 9.00x10 <sup>-4</sup> *           | 1.13[1.12-1.15]  | 1.10[1.09-1.12] | 1.08[1.07-1.09] | 1.90x10 <sup>-5</sup> *       | 5.63x10 <sup>-4</sup> *           |
|                    | MetaboChip  | 1.13 [1.12-1.15] | 1.10 [1.09-1.11] | 1.08 [1.06-1.10] | 6.66x10 <sup>-5</sup> *       | 2.27x10 <sup>-5</sup> *           | 1.15[1.13-1.17]     | 1.10[1.09-1.12] | 1.09[1.08-1.10] | 3.73x10 <sup>-5</sup> *       | 9.88x10 <sup>-4</sup> *           | 1.15[1.13-1.17] | 1.11[1.09-1.12] | 1.08[1.07-1.10] | 5.53x10 <sup>-6</sup> *       | 2.11x10 <sup>-3</sup> *           | 1.14[1.12-1.16]  | 1.11[1.09-1.13] | 1.09[1.07-1.10] | 6.58x10 <sup>-5</sup> *       | 1.11x10 <sup>-3</sup> *           |
|                    | TransEthnic | 1.13 [1.11-1.15] | 1.10 [1.09-1.11] | 1.08 [1.06-1.10] | 8.86x10 <sup>-5</sup> *       | 3.51x10 <sup>-5</sup> *           | 1.15[1.13-1.17]     | 1.10[1.08-1.12] | 1.09[1.08-1.10] | 7.03x10 <sup>-5</sup> *       | 1.67x10 <sup>-3</sup> *           | 1.14[1.12-1.17] | 1.11[1.09-1.12] | 1.08[1.07-1.09] | 3.59x10 <sup>-6</sup> *       | 1.18x10 <sup>-3</sup> *           | 1.13[1.11-1.15]  | 1.11[1.09-1.12] | 1.09[1.07-1.10] | 8.74x10 <sup>-5</sup> *       | 3.06x10 <sup>-3</sup> *           |
| GRS-IR             | Unweighted  | 1.05 [1.02-1.09] | 1.06 [1.03-1.08] | 1.05 [1.01-1.09] | 0.83                          | 0.91                              | 1.08[1.03-1.12]     | 1.05[1.02-1.09] | 1.05[1.02-1.07] | 0.30                          | 0.61                              | 1.09[1.04-1.14] | 1.04[1.01-1.07] | 1.05[1.02-1.07] | 0.24                          | 0.70                              | 1.05[1.01-1.09]  | 1.05[1.02-1.08] | 1.07[1.04-1.09] | 0.39                          | 0.68                              |
|                    | AGEN-T2D    | 1.05 [1.01-1.08] | 1.05 [1.02-1.08] | 1.04 [1.00-1.07] | 0.69                          | 0.70                              | 1.07[1.03-1.12]     | 1.05[1.02-1.09] | 1.04[1.01-1.06] | 0.13                          | 0.37                              | 1.10[1.05-1.15] | 1.03[1.00-1.06] | 1.04[1.01-1.06] | 0.11                          | 0.19                              | 1.06[1.02-1.10]  | 1.03[1.00-1.06] | 1.06[1.03-1.09] | 0.68                          | 0.89                              |
|                    | DIAGRAMv3   | 1.06 [1.02-1.09] | 1.05 [1.02-1.08] | 1.03 [0.99-1.07] | 0.32                          | 0.83                              | 1.07[1.02-1.12]     | 1.06[1.03-1.10] | 1.03[1.01-1.06] | 0.17                          | 0.67                              | 1.11[1.05-1.16] | 1.03[1.00-1.07] | 1.04[1.01-1.06] | 0.07                          | 0.68                              | 1.05[1.01-1.09]  | 1.05[1.02-1.09] | 1.05[1.02-1.08] | 0.97                          | 0.93                              |
|                    | MetaboChip  | 1.07 [1.03-1.11] | 1.06 [1.03-1.09] | 1.03 [0.99-1.07] | 0.19                          | 0.54                              | 1.08[1.03-1.14]     | 1.07[1.04-1.11] | 1.04[1.01-1.06] | 0.06                          | 0.39                              | 1.11[1.06-1.17] | 1.03[1.00-1.07] | 1.05[1.02-1.07] | 0.11                          | 0.56                              | 1.06[1.01-1.11]  | 1.05[1.01-1.09] | 1.06[1.03-1.09] | 0.91                          | 0.69                              |
|                    | TransEthnic | 1.06 [1.03-1.11] | 1.06 [1.03-1.09] | 1.04 [1.00-1.08] | 0.37                          | 0.80                              | 1.09[1.03-1.14]     | 1.07[1.03-1.11] | 1.04[1.01-1.07] | 0.11                          | 0.51                              | 1.11[1.06-1.17] | 1.04[1.00-1.07] | 1.05[1.02-1.08] | 0.15                          | 0.57                              | 1.06[1.01-1.11]  | 1.05[1.01-1.09] | 1.07[1.04-1.10] | 0.72                          | 0.95                              |

BMI strata were defined according to Asian criteria proposed by WHO: Normal weight, <23 kg/m<sup>2</sup>; Overweight, 23-27.5 kg/m<sup>2</sup>; Obese, ≥27.5 kg/m<sup>2</sup>

Sex-specific tertiles were used to define:

waist circumference strata (Low, male <76.9 cm, female <74.4 cm; Medium male ≥76.9-86.1 cm, female ≥74.4-82.8 cm; High, male ≥86.1 cm, female ≥82.8 cm),

Waist-hip ratio strata (Low, male <0.88, female <0.84; Medium male ≥0.88-0.94, female ≥0.84-0.91; High, male ≥0.94, female ≥0.91),

Percent body fat (Low, male <18.8%, female <28.8%; Medium male ≥18.8-24.5%, female ≥28.8-34.9%; High, male ≥24.5%, female ≥34.9%)

\**p* <0.05/12=0.0042
