# Supplementary material for: Evaluation of type 2 diabetes genetic risk variants in Chinese adults: findings from 93,000 individuals from the China Kadoorie Biobank
Source: Springer Nature journal article supplement (doi:10.1007/s00125-016-3920-9), 2016-04-06
Supplement: MOESM16 [file 10017744]

**ESM Table 15 Associations between GRSs and adiposity measurements**

| GRS    | Weighting          | BMI                             |                        | Waist Circumference |                       | Waist-Hip Ratio |                       | Percent Body Fat |                       |
|--------|--------------------|---------------------------------|------------------------|---------------------|-----------------------|-----------------|-----------------------|------------------|-----------------------|
|        |                    | $\beta$ (SE), kg/m <sup>2</sup> | <i>p</i>               | $\beta$ (SE), cm    | <i>p</i>              | $\beta$ (SE)    | <i>p</i>              | $\beta$ (SE), %  | <i>p</i>              |
| GRS-T  |                    |                                 |                        |                     |                       |                 |                       |                  |                       |
|        | Unweighted         | -0.005(0.003)                   | 3.86x10 <sup>-2</sup>  | -0.007(0.007)       | 3.48x10 <sup>-1</sup> | 0.0001(0.0001)  | 7.52x10 <sup>-2</sup> | -0.010(0.005)    | 4.67x10 <sup>-2</sup> |
|        | AGEN-T2D           | -0.006(0.002)                   | 7.62x10 <sup>-3</sup>  | -0.006(0.006)       | 3.62x10 <sup>-1</sup> | 0.0001(0.0000)  | 8.36x10 <sup>-2</sup> | -0.008(0.004)    | 6.36x10 <sup>-2</sup> |
|        | DIAGRAMv3          | -0.009(0.002)                   | 9.12x10 <sup>-5</sup>  | -0.013(0.007)       | 6.10x10 <sup>-2</sup> | 0.0001(0.0000)  | 6.66x10 <sup>-2</sup> | -0.015(0.005)    | 1.63x10 <sup>-3</sup> |
|        | MetaboChip         | -0.008(0.002)                   | 4.04x10 <sup>-4</sup>  | -0.010(0.007)       | 1.54x10 <sup>-1</sup> | 0.0001(0.0000)  | 2.14x10 <sup>-2</sup> | -0.014(0.005)    | 4.59x10 <sup>-3</sup> |
|        | <b>TransEthnic</b> | -0.010(0.002)                   | 2.91x10 <sup>-5</sup>  | -0.013(0.007)       | 5.30x10 <sup>-2</sup> | 0.0001(0.0000)  | 5.89x10 <sup>-2</sup> | -0.015(0.005)    | 1.29x10 <sup>-3</sup> |
| GRS-BC |                    |                                 |                        |                     |                       |                 |                       |                  |                       |
|        | Unweighted         | -0.015(0.004)                   | 1.46x10 <sup>-5</sup>  | -0.018(0.010)       | 7.51x10 <sup>-2</sup> | 0.0001(0.0001)  | 1.26x10 <sup>-1</sup> | -0.019(0.007)    | 7.33x10 <sup>-3</sup> |
|        | AGEN-T2D           | -0.019(0.003)                   | 6.34x10 <sup>-8</sup>  | -0.022(0.010)       | 2.62x10 <sup>-2</sup> | 0.0001(0.0001)  | 1.75x10 <sup>-1</sup> | -0.023(0.007)    | 9.26x10 <sup>-4</sup> |
|        | DIAGRAMv3          | -0.022(0.003)                   | 6.28x10 <sup>-11</sup> | -0.033(0.010)       | 7.54x10 <sup>-4</sup> | 0.0001(0.0001)  | 4.52x10 <sup>-1</sup> | -0.029(0.007)    | 2.30x10 <sup>-5</sup> |
|        | MetaboChip         | -0.023(0.003)                   | 2.15x10 <sup>-11</sup> | -0.034(0.010)       | 4.13x10 <sup>-4</sup> | 0.0000(0.0001)  | 5.22x10 <sup>-1</sup> | -0.030(0.007)    | 1.68x10 <sup>-5</sup> |
|        | <b>TransEthnic</b> | -0.022(0.003)                   | 2.14x10 <sup>-11</sup> | -0.031(0.009)       | 9.73x10 <sup>-4</sup> | 0.0001(0.0001)  | 3.36x10 <sup>-1</sup> | -0.029(0.007)    | 1.69x10 <sup>-5</sup> |
| GRS-IR |                    |                                 |                        |                     |                       |                 |                       |                  |                       |
|        | Unweighted         | -0.011(0.008)                   | 1.40x10 <sup>-1</sup>  | -0.014(0.021)       | 5.26x10 <sup>-1</sup> | 0.0000(0.0002)  | 9.42x10 <sup>-1</sup> | -0.054(0.015)    | 3.79x10 <sup>-4</sup> |
|        | AGEN-T2D           | -0.005(0.007)                   | 4.57x10 <sup>-1</sup>  | -0.001(0.021)       | 9.52x10 <sup>-1</sup> | 0.0000(0.0001)  | 8.26x10 <sup>-1</sup> | -0.041(0.015)    | 4.88x10 <sup>-3</sup> |
|        | DIAGRAMv3          | -0.018(0.009)                   | 3.61x10 <sup>-2</sup>  | -0.041(0.023)       | 7.48x10 <sup>-2</sup> | -0.0002(0.0002) | 1.40x10 <sup>-1</sup> | -0.067(0.016)    | 3.48x10 <sup>-5</sup> |
|        | MetaboChip         | -0.016(0.009)                   | 8.80x10 <sup>-2</sup>  | -0.031(0.024)       | 1.99x10 <sup>-1</sup> | -0.0002(0.0002) | 3.05x10 <sup>-1</sup> | -0.069(0.017)    | 5.04x10 <sup>-5</sup> |
|        | <b>TransEthnic</b> | -0.016(0.009)                   | 7.82x10 <sup>-2</sup>  | -0.028(0.024)       | 2.58x10 <sup>-1</sup> | -0.0001(0.0002) | 5.32x10 <sup>-1</sup> | -0.070(0.017)    | 5.05x10 <sup>-5</sup> |

Adjusting for age, age<sup>2</sup>, sex and region
