# Supplementary material for: Evaluation of type 2 diabetes genetic risk variants in Chinese adults: findings from 93,000 individuals from the China Kadoorie Biobank
Source: Springer Nature journal article supplement (doi:10.1007/s00125-016-3920-9), 2016-04-06

**ESM Fig. 1 Information of studies providing different weight for each variant.**

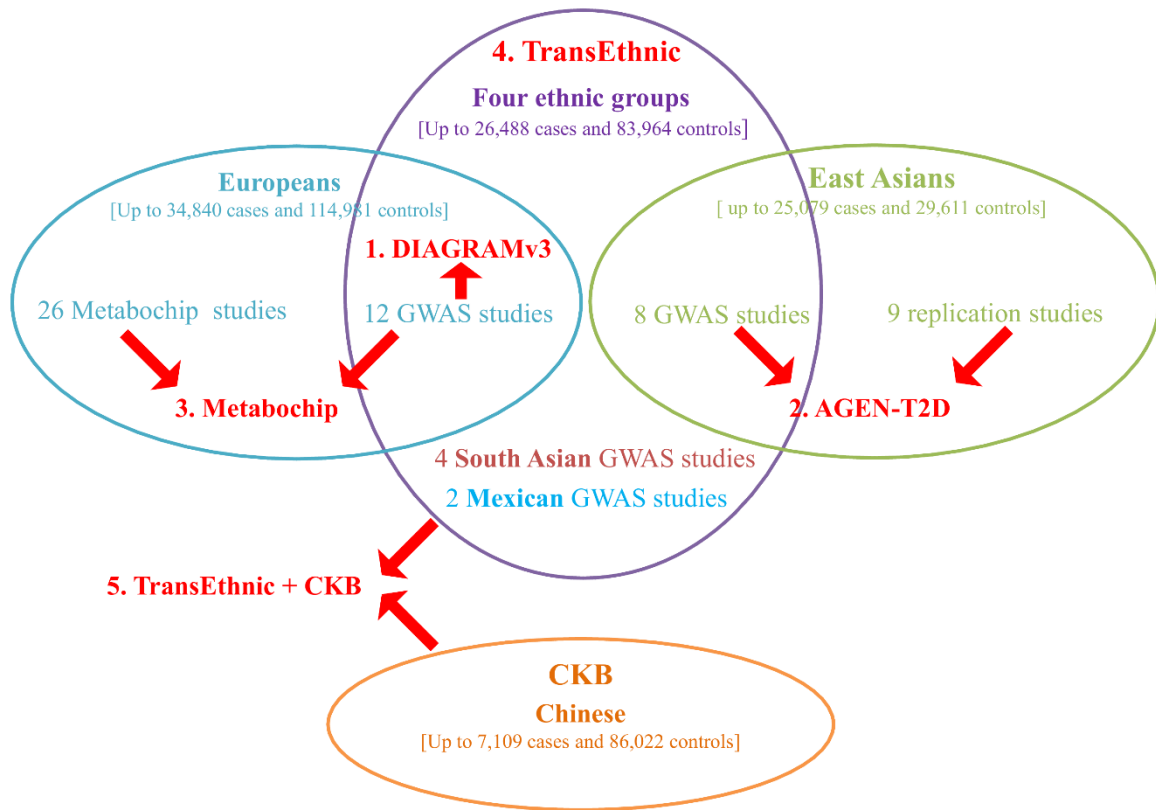

Supplement: MOESM17 [file 10017744]
