# Supplementary material for: Evaluation of type 2 diabetes genetic risk variants in Chinese adults: findings from 93,000 individuals from the China Kadoorie Biobank
Source: Springer Nature journal article supplement (doi:10.1007/s00125-016-3920-9), 2016-04-06

**ESM Fig. 3 Comparison of risk allele frequencies between Chinese and Europeans.** Risk allele frequencies in Europeans were obtained from 1000 Genomes Project Phase 3 and correlation was calculated as Pearson's correlation coefficients ( $r$ ).

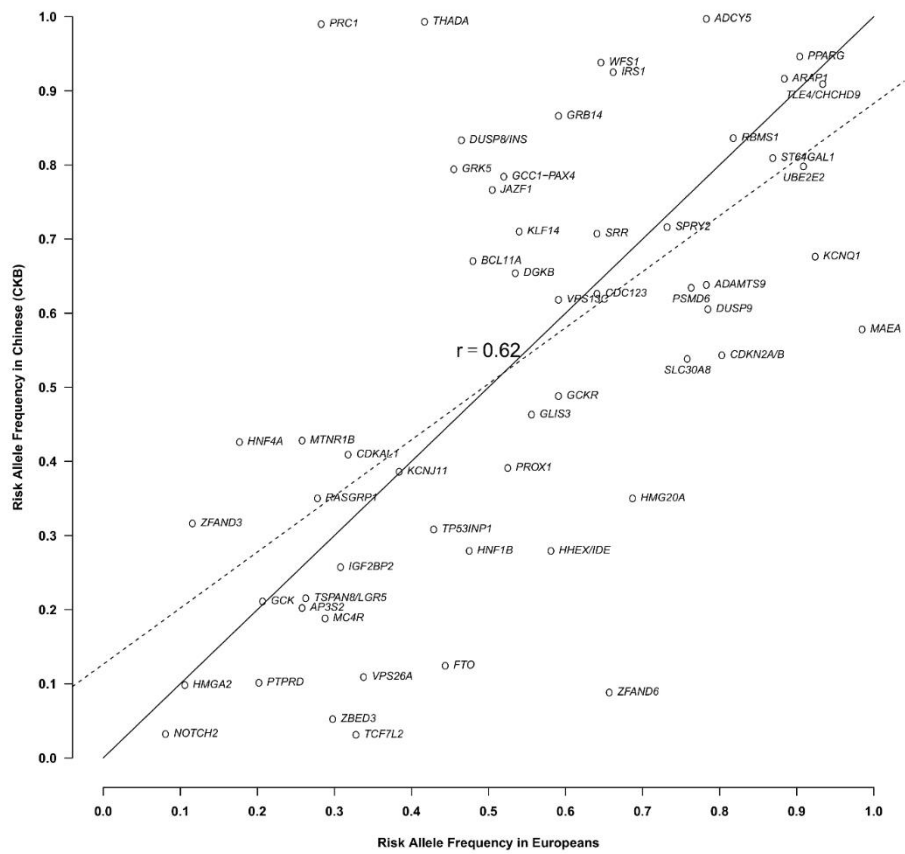

Supplement: MOESM19 [file 10017744]
