# Supplementary material for: Evaluation of type 2 diabetes genetic risk variants in Chinese adults: findings from 93,000 individuals from the China Kadoorie Biobank
Source: Diabetologia. 2016 Apr 6;59:1446–57. doi: 10.1007/s00125-016-3920-9 (PMC4901105; doi:10.1007/s00125-016-3920-9)
Supplement: Supplementary file 2 — (PDF 79 kb) [file 125_2016_3920_MOESM2_ESM.pdf]

ESM Table 1 Genetic and phenotypic evidences for classification of the T2D risk variants

| Chr | Position                                 | SNP        | Nearby genes | Sample Size | Risk Allele | Other Allele | GW               | Reported OR        | Classification      | Classification Criteria | Risk Allele Frequency            | HOMA-IR <sup>a</sup>            | CHIR <sup>b</sup>              | AUC <sup>c</sup>                | AUC <sup>c</sup>                | Inc30 <sup>d</sup>              | Inc30ΔBMI <sup>d</sup>         | Inc30ns <sup>d</sup>           | Dib                             | AUC <sup>c</sup>                | CHIR <sup>b</sup> ΔIS <sup>b</sup> | IGT <sup>e</sup>                 | AIR <sup>f</sup>                | HOMA-IR <sup>a</sup>           | Flad[BMI] <sup>g</sup>        | Flad[BMI]ns <sup>g</sup>        | IS <sup>h</sup>                | Clusters of Type 2 Diabetes Risk Loci <sup>i</sup> | Lipid Traits <sup>i,j,k</sup> | SNPs proposed by Venny et al. <sup>1</sup> |                 |                 |
|-----|------------------------------------------|------------|--------------|-------------|-------------|--------------|------------------|--------------------|---------------------|-------------------------|----------------------------------|---------------------------------|--------------------------------|---------------------------------|---------------------------------|---------------------------------|--------------------------------|--------------------------------|---------------------------------|---------------------------------|------------------------------------|----------------------------------|---------------------------------|--------------------------------|-------------------------------|---------------------------------|--------------------------------|----------------------------------------------------|-------------------------------|--------------------------------------------|-----------------|-----------------|
|     |                                          |            |              |             |             |              |                  |                    |                     |                         |                                  |                                 |                                |                                 |                                 |                                 |                                |                                |                                 |                                 |                                    |                                  |                                 |                                |                               |                                 |                                |                                                    |                               |                                            |                 |                 |
| 1   | 214159256                                | rs308704   | PROX1        | 93,106      | C           | T            | 1.07 (1.05-1.09) | Beta Cell Function | BC[IL, III]         | 0.562                   | -0.014 3.34x10 <sup>-5</sup> **  | -0.021 3.13x10 <sup>-4</sup>    | -0.02 3.72x10 <sup>-3</sup>    | -0.0034 8.78x10 <sup>-3</sup>   | -0.018 4.23x10 <sup>-3</sup>    | -0.0014 9.49x10 <sup>-3</sup>   | -0.013 5.36x10 <sup>-3</sup>   | -0.017 4.59x10 <sup>-3</sup>   | -0.031 1.47x10 <sup>-2</sup>    | -0.028 6.00x10 <sup>-3</sup> ** | -0.043 1.80x10 <sup>-2</sup>       | -0.0042 3.26x10 <sup>-3</sup>    | -0.0047 2.55x10 <sup>-3</sup>   | 0.0068 8.08x10 <sup>-3</sup>   | 0.012 3.80x10 <sup>-3</sup>   | -                               | Beta Cell Function             | -                                                  | β-cell function               |                                            |                 |                 |
| 2   | 43722823                                 | rs757897   | THADA        | 93,131      | T           | G            | 1.15 (1.10-1.20) | Beta Cell Function | BC[IL, III]         | 0.676                   | -0.023 6.98x10 <sup>-5</sup> **  | 0.019 6.08x10 <sup>-3</sup>     | -0.049 2.41x10 <sup>-3</sup>   | -0.023 6.98x10 <sup>-3</sup>    | -0.018 4.19x10 <sup>-3</sup>    | -0.013 6.59x10 <sup>-3</sup>    | -0.018 4.19x10 <sup>-3</sup>   | -0.013 6.59x10 <sup>-3</sup>   | -0.018 4.19x10 <sup>-3</sup>    | -0.013 6.59x10 <sup>-3</sup>    | -0.018 4.19x10 <sup>-3</sup>       | -0.013 6.59x10 <sup>-3</sup>     | -0.018 4.19x10 <sup>-3</sup>    | -0.013 6.59x10 <sup>-3</sup>   | -0.018 4.19x10 <sup>-3</sup>  | -0.013 6.59x10 <sup>-3</sup>    | -                              | Beta Cell Function                                 | -                             | β-cell function                            |                 |                 |
| 3   | 123083778                                | rs1170867  | AOC27        | 93,127      | A           | G            | 1.12 (1.09-1.15) | Beta Cell Function | BC[IL, III]         | 0.774                   | -0.016 1.77x10 <sup>-4</sup> **  | -0.018 5.06x10 <sup>-3</sup>    | 0.023 4.33x10 <sup>-3</sup>    | 0.018 5.22x10 <sup>-3</sup>     | 0.0084 7.08x10 <sup>-3</sup>    | 0.001 1.48x10 <sup>-2</sup>     | 0.006 8.75x10 <sup>-3</sup>    | 0.004 6.42x10 <sup>-3</sup>    | -0.029 3.19x10 <sup>-3</sup>    | -0.001 1.43x10 <sup>-3</sup>    | -0.009 4.96x10 <sup>-3</sup>       | -0.013 5.08x10 <sup>-3</sup>     | -0.001 8.40x10 <sup>-3</sup>    | -0.012 3.89x10 <sup>-3</sup>   | -0.015 8.75x10 <sup>-3</sup>  | -                               | Beta Cell Function             | -                                                  | β-cell function               |                                            |                 |                 |
| 3   | 185250080                                | rs1470579  | IGFBP2       | 93,108      | C           | A            | 1.14 (1.09-1.19) | Beta Cell Function | BC[IL, III]         | 0.296                   | -0.011 1.40x10 <sup>-3</sup>     | -0.025 2.39x10 <sup>-3</sup>    | -0.007 1.25x10 <sup>-3</sup>   | -0.02 3.99x10 <sup>-3</sup>     | -0.031 1.95x10 <sup>-3</sup>    | -0.004 5.48x10 <sup>-3</sup>    | -0.0073 7.36x10 <sup>-3</sup>  | -0.016 3.11x10 <sup>-3</sup>   | -0.028 2.32x10 <sup>-3</sup>    | -0.038 3.00x10 <sup>-3</sup> ** | -0.15 1.40x10 <sup>-2</sup> **     | -0.0085 8.72x10 <sup>-3</sup> ** | -                               | -0.0051 8.96x10 <sup>-3</sup>  | 0.039 9.04x10 <sup>-3</sup>   | -                               | Unclassified                   | -                                                  | β-cell function               |                                            |                 |                 |
| 3   | 18666641                                 | rs16861329 | STKAGL1      | 93,098      | C           | T            | 1.09 (1.06-1.12) | Beta Cell Function | BC[IL, III]         | 0.883                   | 0.0016 7.84x10 <sup>-4</sup> *   | -0.002 3.96x10 <sup>-3</sup>    | -0.041 3.04x10 <sup>-3</sup>   | -0.058 1.30x10 <sup>-3</sup>    | -0.048 2.04x10 <sup>-3</sup>    | -0.09 1.46x10 <sup>-3</sup> **  | -0.029 4.69x10 <sup>-3</sup>   | -0.042 2.49x10 <sup>-3</sup>   | -                               | -                               | -                                  | -                                | -                               | -                              | -                             | -                               | -                              | Unclassified                                       | -                             | NA                                         |                 |                 |
| 4   | 1399901                                  | rs0815464  | MAEA         | 93,162      | C           | T            | 1.13 (1.10-1.16) | Beta Cell Function | BC[IL, III]         | 0.083                   | -0.013 1.10x10 <sup>-3</sup>     | -                               | -                              | -                               | -                               | -                               | -                              | -                              | -                               | -                               | -                                  | -                                | -                               | -                              | -                             | -                               | -                              | -                                                  | Unclassified                  | -                                          | NA              |                 |
| 4   | rs0819241 (proxy of rs0815464, r2=0.966) |            |              |             | T           | C            |                  |                    |                     | 0.033                   | -0.025 9.31x10 <sup>-3</sup> **  | 0.044 4.29x10 <sup>-3</sup>     | -0.017 2.40x10 <sup>-3</sup>   | 0.054 3.31x10 <sup>-3</sup>     | -0.092 8.15x10 <sup>-3</sup>    | -0.081 1.26x10 <sup>-2</sup>    | -0.027 2.31x10 <sup>-3</sup>   | 0.017 7.74x10 <sup>-3</sup>    | 0.056 3.25x10 <sup>-3</sup>     | -                               | -                                  | -                                | -0.004 4.92x10 <sup>-3</sup>    | -0.06 1.31x10 <sup>-3</sup>    | 0.034 5.44x10 <sup>-3</sup>   | -                               | -                              | -                                                  | NA                            |                                            |                 |                 |
| 4   | 6292915                                  | rs10010131 | WFS1         | 45,198      | G           | A            | 1.11 (1.05-1.16) | Beta Cell Function | BC[IL, III]         | 0.677                   | -0.0033 3.18x10 <sup>-3</sup>    | 0.021 1.10x10 <sup>-3</sup>     | 0.029 1.91x10 <sup>-3</sup>    | -0.002 9.94x10 <sup>-3</sup>    | -0.005 6.45x10 <sup>-3</sup>    | -0.028 1.97x10 <sup>-3</sup>    | -0.006 6.45x10 <sup>-3</sup>   | 0.012 1.55x10 <sup>-3</sup>    | -0.025 2.59x10 <sup>-3</sup>    | -                               | -                                  | -                                | -0.0085 3.47x10 <sup>-3</sup> * | -                              | 0.04 6.57x10 <sup>-3</sup>    | -0.048 2.92x10 <sup>-3</sup> *  | -                              | Unclassified                                       | -                             | NA                                         |                 |                 |
| 6   | 206612360                                | rs7758440  | CDKL4        | 93,130      | C           | G            | 1.12 (1.08-1.16) | Beta Cell Function | BC[IL, III]         | 0.196                   | -0.0066 5.77x10 <sup>-3</sup>    | -0.011 2.27x10 <sup>-3</sup>    | -0.05 1.94x10 <sup>-3</sup> ** | -0.062 6.19x10 <sup>-3</sup>    | -0.082 3.62x10 <sup>-3</sup>    | -0.099 3.45x10 <sup>-3</sup>    | -0.028 2.22x10 <sup>-3</sup>   | -0.11 4.40x10 <sup>-3</sup> ** | -                               | -                               | -                                  | -                                | -                               | -                              | -0.0014 7.31x10 <sup>-3</sup> | 0.022 3.88x10 <sup>-3</sup>     | -                              | Beta Cell Function                                 | -                             | β-cell function                            |                 |                 |
| 7   | 15964339                                 | rs2191349  | CDK2         | 93,175      | T           | G            | 1.06 (1.04-1.08) | Beta Cell Function | BC[IL, III]         | 0.467                   | -0.023 5.04x10 <sup>-3</sup> **  | -0.018 1.40x10 <sup>-3</sup>    | -0.007 9.30x10 <sup>-3</sup>   | 0.052 8.02x10 <sup>-3</sup>     | -0.012 5.72x10 <sup>-3</sup>    | -0.007 9.30x10 <sup>-3</sup>    | -0.002 9.30x10 <sup>-3</sup>   | -0.01 6.09x10 <sup>-3</sup>    | -0.026 5.80x10 <sup>-3</sup> ** | -0.013 6.70x10 <sup>-3</sup>    | -0.0015 6.94x10 <sup>-3</sup>      | -0.001 6.30x10 <sup>-3</sup>     | -                               | -                              | -                             | -0.0014 7.31x10 <sup>-3</sup>   | 0.022 3.88x10 <sup>-3</sup>    | -                                                  | Beta Cell Function            | -                                          | β-cell function |                 |
| 7   | 44235668                                 | rs0467517  | GCK          | 93,114      | G           | T            | 1.07 (1.05-1.10) | Beta Cell Function | BC[IL, III]         | 0.136                   | -0.0025 4.84x10 <sup>-3</sup> ** | -0.009 2.48x10 <sup>-3</sup> *  | -0.074 3.07x10 <sup>-3</sup>   | -0.023 3.39x10 <sup>-3</sup>    | -0.055 4.43x10 <sup>-3</sup>    | -0.027 3.77x10 <sup>-3</sup>    | -0.002 1.23x10 <sup>-3</sup>   | -0.002 5.95x10 <sup>-3</sup>   | -                               | -                               | -                                  | -                                | -                               | -                              | -0.028 8.03x10 <sup>-3</sup>  | 0.038 2.59x10 <sup>-3</sup>     | -                              | Hyperglycemic                                      | -                             | β-cell function                            |                 |                 |
| 7   | 12716498                                 | rs0467136  | GCTC/PKAX    | 93,018      | G           | A            | 1.11 (1.07-1.14) | Beta Cell Function | BC[IL, III]         | 0.5                     | 0.0006 8.52x10 <sup>-3</sup>     | -0.018 3.68x10 <sup>-3</sup>    | -0.0024 9.14x10 <sup>-3</sup>  | 0.0077 7.17x10 <sup>-3</sup>    | 0.0081 7.08x10 <sup>-3</sup>    | 0.019 3.61x10 <sup>-3</sup>     | -0.01 1.31x10 <sup>-3</sup>    | 0.0056 7.98x10 <sup>-3</sup>   | 0.036 8.56x10 <sup>-3</sup>     | -                               | -                                  | -                                | -                               | -                              | -                             | -0.02 4.19x10 <sup>-3</sup>     | -0.028 2.25x10 <sup>-3</sup>   | -                                                  | Beta Cell Function            | -                                          | β-cell function |                 |
| 8   | 118183783                                | rs13236634 | SLC20A8      | 92,553      | C           | T            | 1.15 (1.12-1.19) | Beta Cell Function | BC[IL, III]         | 0.523                   | -0.016 2.36x10 <sup>-3</sup> *   | -0.078 6.78x10 <sup>-3</sup> ** | -0.05 2.74x10 <sup>-3</sup>    | -0.041 8.75x10 <sup>-3</sup>    | -0.07 3.67x10 <sup>-3</sup>     | -0.049 4.26x10 <sup>-3</sup>    | -0.023 3.41x10 <sup>-3</sup>   | -0.006 4.26x10 <sup>-3</sup>   | -0.027 4.08x10 <sup>-3</sup>    | -                               | -                                  | -                                | -0.002 9.69x10 <sup>-3</sup>    | -0.004 5.52x10 <sup>-3</sup>   | 0.0091 3.08x10 <sup>-3</sup>  | 0.016 5.05x10 <sup>-3</sup>     | -                              | -                                                  | -                             | β-cell function                            |                 |                 |
| 9   | 4287466                                  | rs7041847  | GLIS3        | 92,708      | G           | T            | 1.10 (1.07-1.13) | Beta Cell Function | BC[IL, III]         | 0.553                   | -0.012 2.76x10 <sup>-3</sup> *   | -0.023 2.49x10 <sup>-3</sup>    | -0.05 2.75x10 <sup>-3</sup>    | -0.026 2.24x10 <sup>-3</sup>    | -0.021 3.19x10 <sup>-3</sup>    | -0.022 3.94x10 <sup>-3</sup>    | -0.0083 7.05x10 <sup>-3</sup>  | -0.026 2.27x10 <sup>-3</sup>   | -                               | -                               | -                                  | -0.0051 1.98x10 <sup>-3</sup>    | -                               | 0.001 4.10x10 <sup>-3</sup>    | 0.007 7.71x10 <sup>-3</sup>   | -                               | -                              | -                                                  | β-cell function               |                                            |                 |                 |
| 9   | 22134094                                 | rs10811661 | CDKN2A-AS    | 93,062      | T           | C            | 1.20 (1.12-1.28) | Beta Cell Function | BC[IL, III]         | 0.801                   | -0.0085 5.11x10 <sup>-3</sup>    | -0.007 1.32x10 <sup>-3</sup>    | -0.058 5.11x10 <sup>-3</sup>   | -0.086 2.99x10 <sup>-3</sup>    | -0.059 4.07x10 <sup>-3</sup>    | -0.084 2.94x10 <sup>-3</sup>    | -0.041 1.70x10 <sup>-3</sup>   | -0.094 1.20x10 <sup>-3</sup>   | -                               | -                               | -                                  | -                                | -                               | -                              | -0.0054 3.01x10 <sup>-3</sup> | -0.0065 1.94x10 <sup>-3</sup>   | 0.0049 7.30x10 <sup>-3</sup>   | 0.019 5.21x10 <sup>-3</sup>                        | -                             | Beta Cell Function                         | -               | β-cell function |
| 10  | 94402882                                 | rs111875   | HHEX/IDE     | 93,093      | C           | T            | 1.13 (1.09-1.17) | Beta Cell Function | BC[IL, III]         | 0.584                   | -0.0042 2.03x10 <sup>-3</sup>    | -0.002 2.45x10 <sup>-3</sup>    | -0.083 2.45x10 <sup>-3</sup>   | -0.087 1.89x10 <sup>-3</sup>    | -0.071 6.52x10 <sup>-3</sup> *  | -0.087 1.89x10 <sup>-3</sup>    | -0.071 6.52x10 <sup>-3</sup> * | -0.087 1.89x10 <sup>-3</sup>   | -0.071 6.52x10 <sup>-3</sup> *  | -                               | -                                  | -                                | -                               | -                              | -                             | -0.0028 4.87x10 <sup>-3</sup>   | -0.0031 8.83x10 <sup>-3</sup>  | -                                                  | Beta Cell Function            | -                                          | β-cell function |                 |
| 10  | 114754808                                | rs7901695  | TCF7L2       | 92,365      | C           | T            | 1.41 (1.26-1.58) | Beta Cell Function | BC[IL, III]         | 0.281                   | -0.019 3.13x10 <sup>-3</sup> *   | -0.07 1.31x10 <sup>-3</sup>     | -0.07 5.37x10 <sup>-3</sup>    | -0.05 4.11x10 <sup>-3</sup> **  | -0.063 1.09x10 <sup>-2</sup> ** | -0.04 6.97x10 <sup>-3</sup>     | -0.056 1.28x10 <sup>-3</sup>   | -0.07 6.18x10 <sup>-3</sup>    | -0.055 2.40x10 <sup>-3</sup> *  | -                               | -                                  | -                                | -                               | -                              | -                             | -0.011 4.69x10 <sup>-3</sup>    | 0.0077 1.37x10 <sup>-3</sup>   | 0.03 2.79x10 <sup>-3</sup>                         | -                             | -                                          | -               | β-cell function |
| 11  | 1702055                                  | rs4752781  | DDIT3/SPIN1  | 92,932      | T           | A            | 1.35             | Beta Cell Function | BC[IL, III]         | 0.465                   | -0.0018 6.05x10 <sup>-3</sup>    | -0.063 2.44x10 <sup>-3</sup>    | -0.05 2.69x10 <sup>-3</sup>    | -0.037 9.14x10 <sup>-3</sup>    | -0.059 7.31x10 <sup>-3</sup>    | -0.027 2.17x10 <sup>-3</sup>    | -0.05 9.13x10 <sup>-3</sup>    | -0.011 1.62x10 <sup>-3</sup>   | -0.058 9.05x10 <sup>-3</sup> *  | -                               | -                                  | -                                | -                               | -                              | -                             | -0.0014 7.36x10 <sup>-3</sup>   | -                              | -                                                  | Unclassified                  | -                                          | NA              |                 |
| 11  | 2839751                                  | rs2273992  | KCNQ1        | 92,921      | C           | T            | 1.40 (1.34-1.47) | Beta Cell Function | BC[IL, III]         | 0.925                   | -0.02 5.78x10 <sup>-3</sup> **   | -0.04 3.69x10 <sup>-3</sup>     | -0.044 3.70x10 <sup>-3</sup>   | -0.033 4.85x10 <sup>-3</sup>    | -0.035 4.00x10 <sup>-3</sup>    | -0.015 7.00x10 <sup>-3</sup>    | -0.016 7.42x10 <sup>-3</sup>   | -0.02 6.82x10 <sup>-3</sup>    | -                               | -                               | -                                  | -                                | -                               | -                              | -0.019 3.64x10 <sup>-3</sup>  | -                               | -                              | Unclassified                                       | -                             | β-cell function                            |                 |                 |
| 11  | 7490630                                  | rs5215     | KCNJ11       | 93,120      | C           | T            | 1.14 (1.10-1.19) | Beta Cell Function | BC[IL, III]         | 0.398                   | 0.0009 7.80x10 <sup>-3</sup>     | -0.046 2.45x10 <sup>-3</sup>    | -0.01 6.15x10 <sup>-3</sup>    | -0.038 7.62x10 <sup>-3</sup>    | -0.056 9.82x10 <sup>-3</sup> ** | -0.047 3.00x10 <sup>-3</sup>    | -0.01 1.50x10 <sup>-3</sup>    | -0.045 3.96x10 <sup>-3</sup> * | -0.04 6.35x10 <sup>-3</sup>     | -                               | -                                  | -                                | -                               | -                              | -                             | -0.0011 6.03x10 <sup>-3</sup>   | -0.004 7.29x10 <sup>-3</sup>   | 0.028 1.94x10 <sup>-3</sup>                        | -                             | -                                          | β-cell function |                 |
| 11  | 7243308                                  | rs1522224  | AKAP1        | 93,130      | A           | C            | 1.14 (1.11-1.17) | Beta Cell Function | BC[IL, III]         | 0.867                   | -0.017 9.39x10 <sup>-3</sup> *   | -0.044 9.66x10 <sup>-3</sup>    | -0.047 1.03x10 <sup>-2</sup>   | -0.051 6.70x10 <sup>-3</sup>    | -0.057 4.26x10 <sup>-3</sup> *  | -0.027 3.39x10 <sup>-3</sup>    | -0.018 4.90x10 <sup>-3</sup>   | -0.025 3.72x10 <sup>-3</sup>   | -0.017 5.32x10 <sup>-3</sup>    | -0.054 1.54x10 <sup>-2</sup> *  | -0.0064 9.10x10 <sup>-3</sup>      | -0.0092 8.46x10 <sup>-3</sup>    | -0.0048 7.51x10 <sup>-3</sup>   | -0.049 1.30x10 <sup>-2</sup> * | 0.023 4.14x10 <sup>-3</sup>   | -                               | Proteinosis                    | -                                                  | β-cell function               |                                            |                 |                 |
| 11  | 92708710                                 | rs1083063  | MTNR1B       | 93,107      | G           | C            | 1.09 (1.06-1.12) | Beta Cell Function | BC[IL, III]         | 0.3                     | -0.039 8.60x10 <sup>-3</sup> **  | -0.082 4.60x10 <sup>-3</sup>    | -0.076 2.52x10 <sup>-3</sup>   | -0.073 3.46x10 <sup>-3</sup> *  | -                               | -                               | -                              | -                              | -                               | -                               | -                                  | -                                | -                               | -                              | -                             | -                               | -                              | Hyperglycemic                                      | -                             | β-cell function                            |                 |                 |
| 13  | 80717136                                 | rs1359790  | SPR2         | 93,096      | G           | A            | 1.15 (1.10-1.20) | Beta Cell Function | BC[IL, III]         | 0.727                   | -0.008 1.58x10 <sup>-3</sup>     | 0.026 9.06x10 <sup>-3</sup>     | -0.033 1.67x10 <sup>-3</sup>   | -0.023 3.24x10 <sup>-3</sup>    | -0.023 3.16x10 <sup>-3</sup>    | -0.011 1.80x10 <sup>-3</sup>    | 0.042 5.30x10 <sup>-3</sup>    | -0.046 5.38x10 <sup>-3</sup>   | 0.023 3.04x10 <sup>-3</sup>     | -                               | -                                  | -                                | -                               | -                              | -                             | -0.0084 1.62x10 <sup>-3</sup> * | -0.003 1.97x10 <sup>-3</sup> * | 0.066 3.06x10 <sup>-3</sup> *                      | -                             | -                                          | NA              |                 |
| 13  | 6236338                                  | rs7172432  | VPS3C        | 93,095      | A           | G            | 1.11 (1.08-1.14) | Beta Cell Function | BC[IL, III]         | 0.58                    | -0.011 1.11x10 <sup>-3</sup> *   | -0.08 3.13x10 <sup>-3</sup> *   | -0.056 8.73x10 <sup>-3</sup>   | -0.056 9.80x10 <sup>-3</sup> ** | -0.064 3.50x10 <sup>-3</sup> *  | -0.084 1.35x10 <sup>-2</sup> ** | -0.081 9.51x10 <sup>-3</sup> * | -0.089 8.20x10 <sup>-3</sup> * | -                               | -                               | -                                  | -                                | -                               | -                              | -                             | -                               | -                              | -                                                  | -                             | β-cell function                            |                 |                 |
| 15  | 90374257                                 | rs2028299  | AP3D2        | 93,115      | A           | C            | 1.10 (1.07-1.13) | Beta Cell Function | BC[IL, III]         | 0.259                   | -0.0017 6.41x10 <sup>-3</sup> *  | -0.041 7.47x10 <sup>-3</sup>    | -0.053 3.36x10 <sup>-3</sup> * | -0.08 1.40x10 <sup>-2</sup> **  | -0.05 4.21x10 <sup>-3</sup> *   | -                               | -                              | -                              | -                               | -                               | -                                  | -                                | -                               | -                              | -                             | -                               | -                              | -                                                  | NA                            | -                                          | NA              |                 |
| 15  | 93521374                                 | rs0426800  | IRF1         | 93,128      | A           | C            | 1.07 (1.05-1.09) | Beta Cell Function | BC[IL, III]         | 0.261                   | -0.0019 5.78x10 <sup>-3</sup>    | -0.044 3.59x10 <sup>-3</sup> *  | -0.023 3.35x10 <sup>-3</sup>   | -0.041 5.56x10 <sup>-3</sup>    | -0.023 3.15x10 <sup>-3</sup>    | -0.039 6.87x10 <sup>-3</sup>    | -0.007 7.58x10 <sup>-3</sup>   | -0.024 6.01x10 <sup>-3</sup>   | -                               | -                               | -                                  | -                                | -                               | -                              | -0.016 1.50x10 <sup>-3</sup>  | 0.00053 9.90x10 <sup>-3</sup>   | 0.0033 4.39x10 <sup>-3</sup>   | -                                                  | -                             | Unclassified                               | -               | NA              |
| 15  | 42446366                                 | rs0017317  | HNF4A        | 93,126      | T           | G            | 1.09 (1.07-1.12) | Beta Cell Function | BC[IL, III]         | 0.183                   | -0.006 1.49x10 <sup>-3</sup>     | -0.036 1.59x10 <sup>-3</sup>    | -0.023 2.81x10 <sup>-3</sup>   | -0.044 1.01x10 <sup>-2</sup>    | -0.042 1.21x10 <sup>-2</sup>    | -0.041 1.08x10 <sup>-2</sup>    | -0.071 5.35x10 <sup>-3</sup>   | -0.024 6.91x10 <sup>-3</sup> * | -                               | -                               | -                                  | -                                | -                               | -                              | -                             | -                               | -                              | -                                                  | -                             | NA                                         | -               | NA              |
| 22  | 27741237                                 | rs780094   | GCKR         | 93,120      | C           | T            | 1.06 (1.04-1.08) | Insulin Resistance | IR[IL, II, III, IV] | 0.066                   | 0.0039 2.52x10 <sup>-3</sup>     | 0.00013 9.50x10 <sup>-3</sup>   | 0.044 5.45x10 <sup>-3</sup>    | 0.011 6.14x10 <sup>-3</sup>     | 0.015 5.01x10 <sup>-3</sup>     | 0.044 5.38x10 <sup>-3</sup>     | 0.032 3.56x10 <sup>-3</sup>    | -0.012 5.87x10 <sup>-3</sup>   | 0.009 3.80x10 <sup>-3</sup>     | 0.034                           | -                                  | -                                | -                               | -                              | -                             | -0.                             |                                |                                                    |                               |                                            |                 |                 |
